# Supplementary material for: Prevalence and correlation of C-shaped root canals of mandibular premolars and molars in Eastern Chinese individuals
Source: Research Square preprint supplement (doi:10.21203/rs.3.rs-1410751/v1), 2022-03-23
Supplement: Supplementary file 1 [file e7b800902a432fcec6fab4ec.xlsx]

## Sheet: 总表
病案号	出生日期	年龄	性别	左下4	左下5	左下6	左下7	右下4	右下5	右下6	右下7	34	44	37	47	34前磨牙C形根管类型	34前磨牙根分叉位置	34根管形态	34根分叉距离冠部最高点距离	36是否有单独的远舌根	44前磨牙C形根管类型	44前磨牙根分叉位置	44前磨牙根管形态	44根分叉距离冠部最高点距离	46是否有单独的远舌根	37C形根类型	47C形根类型
3520446	1973-01-08	49	女	0	0	0	0	0	0	0	0
3520388	2003-01-14	19	女	1	0	0	0	0	0	0	0	34ML发育沟	44ML发育沟			C4-C1-C4-C4	无分叉	V1	C4-C4-C4-C4	无分叉	V1
2107190150	1999-01-31	23	男	0	0	0	1	0	0	0	1			颊舌发育沟，舌侧深	颊舌发育沟，舌侧深							C3-C3-C3-C3	C2-C2-C2-C2
2107190178	1987-02-21	35	女	0	0	0	0	0	0	0	0
3519098	1995-10-07	27	男	0	0	0	1	0	0	0	0			颊舌发育沟，舌侧深								C3-C2-C1-C4
3518956	2001-10-09	21	男	1	0	0	0	0	0	0	0	34ML发育沟	44ML发育沟			C4-C3-C2-C4	根中1/3	V3	C3-C3-C3-C3	根上1/3	V5
3518910	2004-04-12	18	男	0	0	0	1	0	0	0	1			舌侧发育沟	舌侧发育沟							C1-C1-C1-C4	C1-C1-C1-C1
3518858	1983-01-31	39	女	0	0	0	0	0	0	0	0
3518751	1994-10-06	28	女	0	0	0	1	0	0	0	1			舌侧发育沟	舌侧发育沟							C1-C2-C2-C4	C1-C2-C2-C4
3518587	2001-10-10	21	女	1	0	0	1	1	0	0	1	34 ML发育沟	44ML发育沟	颊舌发育沟，舌侧深	颊舌发育沟，舌侧深	C4-C3-C1-C4	根中1/3	V3	C4-C3-C2-C1	根中1/3	V3	C1-C1-C1-C4	C1-C2-C2-C1
3518502	1984-02-26	38	女	0	0	0	1	0	0	0	1			舌侧发育沟	颊舌发育沟，舌侧深							C1-C2-C4-C4	C1-C3-C4-C4
3518343	2003-08-10	19	女	1	0	0	0	1	0	0	0	34ML发育沟	44ML发育沟			C4-C3-C2-C4	根中1/3	V3	C4-C3-C2-C3	根尖1/3	V5
3518363	1990-11-08	32	男	0	0	0	1	0	0	0	1			舌侧发育沟	舌侧发育沟							C1-C1-C1-C4	C1-C1-C1-C4
3518303	1990-12-12	32	女	1	1	0	1	0	0	0	1	34L发育沟	44L发育沟	颊舌发育沟,舌侧深	颊舌发育沟，舌侧深	C4-C1-C3-C3	根中1/3	V5	C4-C4-C4-C4	无分叉	V5	C2-C3-C3-C3	C2-C3-C3-C3
3518298	1999-10-12	23	男	0	0	0	0	0	0	0	0
3518287	1982-06-08	40	男	0	0	0	0	0	0	0	0
3518111	2000-02-10	22	女	0	0	0	1	0	0	0	1			颊舌发育沟，舌侧深	舌侧发育沟							C2-C3-C2-C2	C1-C3-C1-C4
3518047	1994-05-27	28	女	1	0	0	1	0	0	0	1	34ML 发育沟	44ML发育沟	舌侧发育沟	舌侧发育沟	C4-C3-C2-C3	根中1/3	V5	C4-C4-C5-C5	无分叉	V1	C1-C2-C1-C4	C1-C2-C4-C4
3517938	2002-06-24	20	女	0	0	0	0	0	0	0	0
3517870	1995-12-14	27	男	0	0	0	0	0	0	0	0
3517776	1997-08-14	25	女	0	0	0	1	0	0	0	1			颊舌发育沟，舌侧深	舌侧发育沟							C2-C2-C2-C4	C1-C2-C1-C4
3517681	2001-10-26	21	女	0	0	0	1	0	0	0	1			舌侧发育沟	舌侧发育沟							C1-C2-C2-C2	C1-C3-C2-C2
3517679	2002-02-15	20	女	0	0	0	0	0	0	0	0
3517559	1991-12-27	31	男	0	0	0	0	0	0	0	0
3517536	1992-01-28	30	男	0	0	0	0	0	0	0	0
3517491	2002-05-02	20	男	1	0	0	1	0	0	0	0	34L发育沟		颊舌发育沟，舌侧深		C4-C1-C4-C4	无分叉	V1				C2-C2-C2-C4
3517379	2001-10-11	21	女	0	0	0	0	0	0	0	1				舌侧发育沟								C2-C1-C1-C4
3517174	2001-06-15	21	女	0	0	0	1	1	0	0	1	34ML发育沟	44ML发育沟	舌侧发育沟	舌侧发育沟	C4-C4-C4-C4	无分叉	V5	C3-C3-C2-C5	根上1/3	V3	C1-C2-C3-C4	C1-C2-C2-C4
3517165	2002-01-17	20	女	0	0	0	0	0	0	0	0
3517161	1985-08-07	37	女	0	0	0	1	0	0	0	0			颊舌发育沟，舌侧深								C2-C2-C2-C2
3517035	1986-11-29	36	女	0	0	0	0	0	0	0	0
3516898	1999-08-27	23	女	0	0	0	1	0	0	0	1			舌侧发育沟	舌侧发育沟							C2-C2-C2-C4	C3-C2-C1-C4
3516700	1999-06-09	23	女	0	0	0	0	0	0	0	1				颊舌发育沟，舌侧深								C2-C3-C3-C3
3516857	1984-10-11	38	女	0	0	0	0	0	0	0	0
3516778	1995-08-28	27	男	0	0	0	0	0	0	0	0
3516529	1994-08-15	28	女	0	0	0	1	0	0	0	1			舌侧发育沟	舌侧发育沟							C1-C2-C2-C4	C2-C2-C1-C4
3516513	2002-10-19	20	女	0	0	0	0	0	0	0	0
3516500	1990-04-08	32	女	0	0	0	1	0	0	0	0			舌侧发育沟								C1-C2-C1-C4
3516493	1992-03-03	30	女	0	0	0	0	0	0	0	0
3516310	1998-06-24	24	男	0	0	0	0	0	0	0	0
3516149	1978-09-12	44	男	0	0	0	0	0	0	0	0
3516067	1992-12-12	30	男	1	0	0	1	1	0	0	1	34ML发育沟	44ML发育沟	舌侧发育沟	舌侧发育沟	C3-C3-C2-C3	根上1/3	V5	C4-C1-C4-C4	无分叉	V1	C1-C2-C2-C4	C1-C2-C1-C4
3515663	1983-01-29	39	女	0	0	0	1	0	0	0	1			舌侧发育沟	舌侧发育沟							C1-C2-C1-C4	C2-C2-C4-C5
3515665	2000-09-22	22	男	1	0	0	1	1	0	1	0	34L发育沟	44L发育沟	舌侧发育沟		C4-C3-C2-C3	根中1/3	V5	C4-C3-C2-C4	根中1/3	V5	C1-C2-C3-C3
3515686	1997-07-24	25	男	0	0	0	0	0	0	0	0
3515666	2004-01-26	18	女	0	0	0	1	0	0	0	1			舌侧发育沟	舌侧发育沟							C2-C2-C4-C4	C1-C1-C1-C4
3515583	1994-06-19	28	男	0	0	0	1	0	0	0	1			舌侧发育沟	舌侧发育沟							C1-C1-C1-C4	C1-C2-C1-C4
3515577	1989-07-23	33	男	0	0	0	1	0	0	0	1			舌侧发育沟	舌侧发育沟							C1-C2-C2-C4	C3-C2-C2-C4
3515528	2002-02-24	20	女	0	0	0	0	0	0	0	0
3515430	1997-07-31	25	女	0	0	0	0	0	0	0	0
3515380	1994-01-20	28	女	0	0	0	0	0	0	0	0
3515369	1995-01-23	27	男	0	0	0	0	0	0	0	0
3515180	1983-12-03	39	女	0	0	0	0	0	0	0	0
3514978	1997-05-24	25	男	0	0	0	1	1	0	0	1		44ML发育沟	舌侧发育沟	颊舌发育沟，舌侧深				C3-C3-C2-C3	根上1/3	V5	C1-C2-C2-C4	C2-C2-C2-C4
3514660	2000-11-18	22	女	0	0	0	0	0	0	0	0
3514724	1994-02-05	28	女	0	0	0	1	0	0	0	1			舌侧发育沟	舌侧发育沟							C1-C1-C1-C4	C4-C4-C4-C4
3513793	2001-08-16	21	男	0	0	0	0	1	0	0	1	34ML发育沟	44ML发育沟		舌侧发育沟	C3-C3-C3-C5	根上1/3	V5	C3-C3-C2-C3	根上1/3	V5		C1-C2-C3-C2
3514245	1988-09-19	34	女	1	0	0	1	0	0	0	1	34ML发育沟	44ML发育沟	舌侧发育沟	颊舌发育沟，舌侧深	C3-C3-C2-C3	根上1/3	V5	C4-C3-C3-C3	根中1/3	V5	C1-C3-C2-C3	C2-C3-C2-C2
3514273	1998-11-19	24	女	0	0	0	1	0	0	0	1			颊舌发育沟，舌侧深	颊舌发育沟，舌侧深							C2-C3-C2-C1	C2-C2-C3-C3
3514166	1997-10-16	25	女	0	0	0	1	0	0	0	0			舌侧发育沟								C2-C2-C3-C2
3514120	1991-12-11	31	女	0	0	0	0	0	0	0	0		44ML发育沟						C4-C4-C4-C4	无分叉	V1
3514039	2002-10-02	20	男	0	0	0	0	0	0	0	0
3513993	1990-04-05	32	女	0	0	0	0	0	0	0	1				颊舌发育沟，舌侧深								C4-C2-C3-C3
3513890	1986-03-10	36	女	0	0	0	1	0	0	0	1			舌侧发育沟	颊舌发育沟，舌侧深							C1-C3-C2-C2	C2-C3-C3-C3
3513868	1993-01-20	29	男	0	0	0	0	0	0	0	0
3513915	2001-10-17	21	女	0	0	0	1	0	0	0	1			舌侧发育沟	舌侧发育沟							C1-C2-C5-C5	C1-C2-C2-C2
3511719	2002-01-01	20	男	0	0	0	0	0	0	0	0
3511687	1998-12-23	24	女	0	0	0	1	0	0	0	1			舌侧发育沟	舌侧发育沟							C2-C3-C3-C5	C1-C2-C3-C2
3511528	2003-07-29	19	女	1	0	0	0	1	0	0	1	34ML发育沟	44ML发育沟		颊舌发育沟，舌侧深	C4-C2-C1-C4	根中1/3	V3	C4-C1-C1-C4	无分叉	V1		C1-C2-C2-C4
3511475	2004-11-07	18	女	0	0	0	0	0	0	0	0
3511435	1996-12-28	26	女	0	0	0	0	0	0	0	0
3511410	2004-10-29	18	女	0	0	0	1	0	0	0	1			舌侧发育沟	舌侧发育沟							C1-C3-C2-C2	C1-C3-C3-C3
3511252	2004-07-16	18	女	0	0	0	1	0	0	0	1			舌侧发育沟	舌侧发育沟							C2-C3-C3-C3	C1-C3-C3-C3
3511194	1978-11-29	44	女	0	0	0	0	0	0	0	0
3511110	1999-06-16	23	男	1	0	0	0	0	0	0	0	34ML发育沟				C3-C3-C2-C1	根上1/3	V5
3511088	1996-07-04	26	女	0	0	0	1	0	0	0	1			舌侧发育沟	舌侧发育沟							C1-C2-C2-C2	C2-C2-C3-C5
3510915	1985-05-15	37	女	0	0	0	0	0	0	0	0
3510820	2003-07-03	19	男	0	0	0	0	0	0	0	0
3510807	1995-07-25	27	男	0	0	0	0	0	0	0	0
3510547	2002-10-16	20	女	0	0	0	1	0	0	0	1			舌侧发育沟	舌侧发育沟							C1-C1-C2-C2	C1-C2-C2-C2
3510498	1999-12-13	23	女	0	0	0	1	0	0	0	1			舌侧发育沟	舌侧发育沟							C1-C2-C2-C4	C1-C2-C2-C4
3510467	1981-03-04	41	女	0	0	0	0	0	0	0	0
3510447	1996-10-01	26	男	1	0	0	0	1	0	0	0	34ML发育沟	44ML发育沟			C4-C3-C2-C3	根中1/3	V5	C4-C3-C2-C3	根中1/3	V5
3510333	2001-07-07	21	男	0	0	0	0	0	0	0	0	34ML发育沟				C3-C3-C3-C3	根上1/3	V5
3510339	2001-01-04	21	女	0	0	0	1	0	0	0	1			舌侧发育沟	舌侧发育沟							C1-C2-C1-C4	C1-C1-C1-C4
2107190003	1995-07-19	27	男	0	0	0	0	0	0	0	0
3510303	2003-08-27	19	女	0	0	0	1	0	0	0	1	34L发育沟	44L发育沟	颊舌发育沟，舌侧深	颊舌发育沟，舌侧深	C4-C3-C3-C5	根中1/3	V5	C4-C3-C2-C3	根中1/3	V5	C1-C2-C2-C4	C1-C3-C2-C4
3510191	2005-08-01	17	男	0	0	0	0	0	0	0	0		44L发育沟						C4-C4-C4-C4	无分叉	V1
3510264	1988-09-23	34	女	0	0	0	0	0	0	0	0	34ML发育沟	44ML发育沟			C3-C3-C3-C3	根上1/3	V5	C3-C3-C3-C3	根上1/3	V5
3510189	1990-01-01	32	女	0	0	0	0	0	0	0	0	34ML发育沟	44ML发育沟			C3-C3-C3-C3	根上1/3	V5	C4-C4-C4-C4	无分叉	V1
3510149	2002-07-28	20	女	0	0	0	1	1	0	0	1		44ML发育沟	舌侧发育沟	舌侧发育沟				C4-C1-C4-C4	无分叉	V1	C1-C1-C1-C4	C1-C1-C1-C4
2107190001	2003-07-19	19	男	0	0	0	0	0	0	0	0
3510031	1997-04-26	25	女	0	0	0	0	0	0	0	0
3509999	2004-07-18	18	女	0	0	0	1	0	0	0	0			舌侧发育沟								C1-C3-C2-C4
3509974	2003-07-02	19	女	1	0	0	0	0	0	0	0	34ML发育沟				C4-C3-C2-C3	根中1/3	V5
3509870	1996-02-19	26	女	0	0	0	0	0	0	0	0
3509883	1996-01-14	26	女	0	0	0	1	0	0	0	1			颊舌发育沟，舌侧深	颊舌发育沟，舌侧深							C2-C3-C5-C5	C1-C3-C3-C3
3509831	2004-02-25	18	女	0	0	0	0	0	0	0	0
3509763	2002-01-22	20	女	0	0	0	0	0	0	0	0
3509268	2001-03-30	21	男	1	0	0	0	0	0	0	0	34ML及颊侧发育沟	ML及颊侧发育沟			C3-C3-C2-C3	根上1/3	V5	C4-C3-C3-C3	根中1/3	V5
3509683	1992-07-08	30	女	0	0	0	1	0	0	0	1			舌侧发育沟	舌侧发育沟							C2-C3-C2-C2	C1-C2-C3-C2
3509542	2001-10-14	21	男	0	0	0	0	0	0	0	0
3509467	2004-08-30	18	女	0	0	0	0	0	0	0	0
3509286	1999-07-26	23	男	1	0	0	0	1	0	0	1	34ML发育沟	44ML发育沟		舌侧发育沟	C4-C1-C2-C4	根中1/3	V3	C4-C2-C1-C4	根中1/3	V3		C1-C1-C1-C4
3509242	1998-08-02	24	女	0	0	0	0	0	0	0	0
3509241	1996-10-21	26	女	1	0	0	0	0	0	0	0	34ML发育沟				C4-C2-C3-C3	根中1/3	V5
3509246	1996-11-18	26	男	0	0	0	0	0	0	0	0
3509119	1988-01-14	34	男	0	0	0	0	0	0	0	1				颊舌发育沟，舌侧深								C3-C3-C3-C1
3509111	2001-03-29	21	男	0	0	0	0	0	0	0	0
3508495	2002-06-18	20	男	0	0	0	0	1	0	0	1		44ML发育沟		颊舌发育沟，舌侧深				C4-C2-C3-C3	根中1/3	V5		C3-C3-C3-C3
3508994	1999-03-18	23	女	0	0	0	1	0	0	0	1			颊舌发育沟，舌侧深	颊舌发育沟，舌侧深							C2-C2-C2C2	C2-C3-C2-C2
3508977	2003-01-17	19	女	0	0	0	0	0	0	0	0
3508845	1979-01-20	43	男	0	0	0	1	0	0	0	1	34ML发育沟	44ML发育沟	舌侧发育沟	舌侧发育沟	C3-C3-C3-C3	根上1/3	V5	C3-C3-C3-C3	根上1/3	V5	C1-C2-C3-C4	C1-C3-C2-C2
3508406	1998-12-01	24	男	0	0	0	0	0	0	0	0
3508777	1999-03-28	23	女	1	0	0	0	0	0	0	0	34ML发育沟	44ML发育沟			C4-C2-C2-C3	根中1/3	V5	C4-C3-C5-C5	根中1/3	V5
3508501	2003-02-14	19	女	0	0	0	1	0	0	0	1			颊舌发育沟，舌侧深	舌侧发育沟							C2-C3-C3-C3	C1-C2-C2-C2
3508478	1998-02-02	24	女	0	0	0	1	0	0	0	1			舌侧发育沟	舌侧发育沟							C1-C2-C1-C4	C1-C1-C1-C1
3508460	1988-10-16	34	女	0	0	0	1	0	0	0	1			舌侧发育沟	舌侧发育沟							C3-C2-C2-C2	C2-C3-C3-C3
3508169	1994-04-16	28	女	0	0	0	1	0	0	0	1			舌侧发育沟	舌侧发育沟							C1-C3-C3-C3	C2-C3-C3-C3
3508316	2002-10-26	20	女	0	0	0	1	0	0	0	0			颊舌发育沟，舌侧深								C3-C2-C1-C4
3508330	2000-05-26	22	男	0	0	0	1	0	0	0	1			舌侧发育沟	舌侧发育沟							C1-C3-C3-C5	C2-C3-C3-C3
3508280	2001-08-15	21	男	1	0	0	0	1	0	0	0	34ML发育沟	44ML发育沟			C3-C3-C2-C3	根上1/3	V5	C3-C3-C2-C3	根上1/3	V5
3508257	2001-04-27	21	女	0	0	0	1	0	0	0	1			舌侧发育沟	颊舌发育沟，舌侧深							C2-C3-C1-C4	C2-C2-C2-C4
3508152	2004-05-16	18	男	0	0	0	0	0	0	0	0
3508227	2000-02-17	22	女	0	0	0	0	1	0	0	0	34ML发育沟	44ML发育沟			C4-C3-C3-C3	根中1/3	V5	C4-C3-C2-C4	根中1/3	V5
3508092	1970-03-05	52	女	1	0	0	1	1	0	0	1	34ML发育沟	44ML发育沟	颊舌发育沟，舌侧深	颊舌发育沟，舌侧深	C4-C2-C3-C3	根中1/3	V5	C4-C3-C3-C3	根中1/3	V5	C2-C2-C2-C2	C2-C2-C2-C2
3508036	2003-03-02	19	女	0	0	0	1	0	0	0	1			舌侧发育沟	舌侧发育沟							C1-C1-C2-C1	C1-C2-C3-C2
3508036	1989-06-30	33	女	0	0	0	1	0	0	0	0			舌侧发育沟								C2-C3-C2-C2
3508011	2004-02-23	18	女	0	0	0	0	0	0	0	0
3507933	1995-02-03	27	女	0	0	0	1	0	0	0	1	34ML发育沟	44ML发育沟	颊舌发育沟，舌侧深	颊舌发育沟，舌侧深	C4-C4-C4-C4	无分叉	V1	C4-C3-C3-C3	根中1/3	V5	C1-C3-C3-C3	C2-C3-C3-C3
3507891	2002-10-21	20	男	0	0	0	1	0	0	0	1			舌侧发育沟	舌侧发育沟							C2-C2-C2-C4	C2-C2-C2-C4
3507731	2004-04-21	18	男	0	0	0	1	0	0	0	1			颊舌发育沟，舌侧深	颊舌发育沟，舌侧深							C2-C2-C2-C4	C2-C2-C4-C4
3507728	2003-11-20	19	女	0	0	0	1	0	0	0	1			颊舌发育沟，舌侧深	颊舌发育沟，舌侧深							C1-C2-C1-C4	C2-C2-C2-C4
3507701	1996-10-02	26	女	0	0	0	1	0	0	0	1			颊舌发育沟，舌侧深	颊舌发育沟，舌侧深							C2-C2-C2-C4	C2-C2-C2-C2
3507648	2000-07-04	22	女	0	0	0	1	0	0	0	1			舌侧发育沟	舌侧发育沟							C2-C2-C2-C2	C2-C2-C2-C5
3507656	1998-03-29	24	女	0	0	0	1	0	0	0	0			颊舌发育沟，舌侧深								C2-C2-C3-C4
3507590	2002-07-26	20	女	0	0	0	0	1	0	0	0	34ML发育沟	44ML发育沟			C4-C3-C3-C3	根中1/3	V5	C4-C3-C2-C3	根中1/3	V5
3507591	2002-03-08	20	女	0	0	0	1	0	0	0	1			舌侧发育沟	舌侧发育沟							C1-C1-C1-C1	C1-C2-C1-C1
3507548	1986-09-04	36	女	0	0	0	0	0	0	0	1				颊舌发育沟，颊侧深								C1-C2-C2-C2
3236693	1992-11-30	30	女	0	0	0	0	0	0	0	1				舌侧发育沟								C1-C3-C2-C4
3507513	2000-09-23	22	女	0	0	0	1	0	0	0	0			颊舌发育沟，舌侧深								C2-C3-C2-C4
3505009	1987-02-20	35	男	0	0	0	1	0	0	0	1			舌侧发育沟	舌侧发育沟							C1-C2-C1-C1	C1-C2-C1-C1
3505061	1999-02-25	23	女	0	0	0	1	0	0	0	1			舌侧发育沟	舌侧发育沟							C1-C2-C2-C4	C2-C2-C2-C2
3505010	2002-01-07	20	女	1	0	0	0	0	0	0	0	34ML发育沟				C4-C3-C2-C3	根中1/3	V5
3505129	2000-11-14	22	男	0	0	0	1	0	0	0	0	34ML发育沟		颊舌发育沟，舌侧深		C4-C4-C4-C4	无分叉	V1				C2-C3-C3-C3
3504607	2001-03-20	21	女	1	0	0	1	1	0	0	1	34ML发育沟	44ML发育沟	舌侧发育沟	舌侧发育沟	C4-C3-C2-C3	根中1/3	V5	C4-C1-C2-C3	根中1/3	V5	C2-C2-C4-C4	C1-C2-C1-C4
3504496	2001-03-03	21	男	0	0	0	0	0	0	0	0
3504488	2000-01-16	22	女	0	0	1	1	0	0	1	1			舌侧发育沟	舌侧发育沟							C1-C2-C1-C4	C1-C2-C1-C2
3504489	2000-10-14	22	女	0	0	0	1	0	0	0	1			颊舌发育沟，舌侧深	颊舌发育沟，舌侧深							C2-C2-C2-C4	C2-C2-C2-C2
3504428	1996-06-02	26	女	0	0	0	1	0	0	0	1			舌侧发育沟	舌侧发育沟							C1-C2-C2-C2	C1-C2-C2-C5
3504251	2000-10-21	22	男	0	0	0	1	0	0	0	1			舌侧发育沟	舌侧发育沟							C2-C3-C2-C2	C2-C3-C2-C2
3504133	1986-12-06	36	女	0	0	0	1	0	0	0	1			舌侧发育沟	舌侧发育沟							C2-C2-C4-C4	C1-C2-C2-C4
3503969	2001-11-10	21	女	0	0	0	0	0	0	0	1				舌侧发育沟								C1-C2-C2-C2
3503956	1993-09-07	29	男	0	0	0	1	0	0	0	1			颊舌发育沟，舌侧深	颊舌发育沟，舌侧深							C1-C2-C1-C4	C1-C2-C1-C4
3503806	2002-12-17	20	女	0	0	0	0	0	0	0	0
3503926	2004-12-15	18	女	1	0	0	1	0	0	0	1	34ML发育沟	44ML发育沟	颊舌发育沟，舌侧深	颊舌发育沟，舌侧深	C4-C3-C2-C3	根尖1/3	V5	C4-C4-C4-C4	无分叉	V1	C2-C2-C2-C2	C2-C2-C2-C2
3503872	2002-06-16	20	女	0	0	0	0	0	0	0	0
3503791	1995-12-24	27	女	1	0	0	1	1	0	0	0	34ML发育沟	44ML发育沟	颊舌发育沟，舌侧深		C4-C2-C3-C3	根中1/3	V5	C4-C3-C2-C4	根中1/3	V5	C2-C3-C1-C4
3503825	1999-11-03	23	女	0	0	0	0	0	0	0	1				颊舌发育沟，舌侧深								C2-C3-C3-C5
3503820	1991-01-06	31	女	0	0	0	0	0	0	0	0
3503788	1991-10-02	31	女	0	0	0	0	0	0	0	0
3503720	1992-06-24	30	女	0	0	0	1	0	0	0	0			舌侧发育沟								C1-C2-C2-C4
3503634	2004-01-17	18	男	0	0	0	1	1	0	0	1		44ML发育沟	舌侧发育沟	舌侧发育沟				C4-C1-C3-C3	根中1/3	V5	C2-C2-C1-C4	C2-C2-C1-C4
3503625	2001-11-08	21	男	0	0	0	1	0	0	0	1			颊舌发育沟，舌侧深	颊舌发育沟，舌侧深							C3-C2-C2-C4	C2-C3-C2-C2
3503455	2003-04-29	19	女	0	0	0	1	0	0	0	0		44ML发育沟	舌侧发育沟					C4-C3-C3-C5	根中1/3	V5	C1-C2-C2-C4
3503413	1999-10-06	23	女	0	0	0	1	0	0	0	1			颊舌发育沟，舌侧深	颊舌发育沟，舌侧深							C1-C2-C1-C4	C2-C1-C1-C4
3503410	2002-11-30	20	女	1	0	0	1	0	0	0	1	34ML发育沟	44ML发育沟	舌侧发育沟	舌侧发育沟	C4-C3-C2-C3	根中1/3	V5	C4-C3-C3-C3	根中1/3	V5	C1-C3-C2-C2	C1-C3-C2-C2
3503370	1989-08-10	33	女	0	0	0	0	0	0	0	0
3503330	1990-08-09	32	女	0	0	0	0	1	0	0	0	34ML发育沟	44ML发育沟			C4-C3-C3-C5	根中1/3	V5	C4-C3-C3-C3	根中1/3	V5
3503262	1999-07-09	23	女	0	0	0	1	0	0	0	1			颊舌发育沟，舌侧深	颊舌发育沟，舌侧深							C1-C2-C3-C2	C2-C3-C2-C2
2107140003	1973-07-14	49	男	0	0	0	1	0	0	0	1			舌侧发育沟	舌侧发育沟							C1-C2-C4-C4	C2-C2-C4-C4
3503212	1994-10-13	28	女	0	0	0	0	0	0	0	0
2107140002	1999-07-14	23	女	0	0	0	0	0	0	0	0
3503189	1993-05-06	29	女	0	0	0	0	0	0	0	0
3503107	1998-08-16	24	男	1	0	0	0	1	0	0	0	34ML发育沟	44ML发育沟			C4-C1-C4-C4	无分叉	V1	C4-C3-C2-C3	根中1/3	V5
3503069	1996-12-06	26	男	0	0	0	0	1	0	0	0	34ML发育沟	44ML发育沟			C4-C3-C3-C3	根中1/3	V5	C4-C3-C2-C3	根中1/3	V5
3502904	2001-03-04	21	女	0	0	0	1	0	0	0	1		44ML发育沟	舌侧发育沟	舌侧发育沟				C4-C4-C4-C4	无分叉	V1	C2-C2-C2-C4	C1-C3-C1-C4
3503009	2004-04-19	18	女	0	0	0	1	0	0	0	1			颊舌发育沟，舌侧深	颊舌发育沟，舌侧深							C2-C2-C1-C4	C2-C1-C1-C4
3502960	2000-05-05	22	男	0	0	0	1	0	0	0	1			舌侧发育沟	舌侧发育沟							C1-C1-C1-C4	C1-C2-C1-C4
3502946	1975-01-04	47	男	0	0	0	0	0	0	0	0
3502760	1999-09-03	23	女	0	0	0	0	0	0	0	0
3502792	1972-02-07	50	女	0	0	0	0	0	0	0	0
3092239	1967-08-21	55	女	0	0	0	0	0	0	0	0
3502809	2002-12-06	20	男	0	0	0	0	0	0	0	0
3502764	2003-09-12	19	女	0	0	0	0	0	0	0	1				颊舌发育沟，舌侧深								C2-C2-C1-C4
3502504	1982-01-10	40	女	0	0	0	0	0	0	0	0
3502477	1997-05-27	25	女	0	0	0	1	0	0	0	1			舌侧发育沟	舌侧发育沟							C1-C2-C1-C4	C1-C2-C1-C4
3502496	2001-04-08	21	男	0	0	0	0	0	0	0	0
3502447	1988-10-12	34	女	0	0	0	1	0	0	0	1			舌侧发育沟	舌侧发育沟							C1-C2-C2-C4	C1-C2-C2-C4
3502027	1998-01-02	24	男	0	0	0	0	0	0	0	0
3502404	1982-02-07	40	女	0	0	0	0	0	0	0	0
3502318	2003-08-20	19	女	0	0	0	0	1	0	0	0	34L发育沟	44ML发育沟			C4-C3-C4-C5	根尖1/3	V5	C4-C3-C2-C5	根尖1/3	V5
3502369	2004-06-13	18	男	0	0	0	1	0	0	0	1			颊舌发育沟，舌侧深	颊舌发育沟，舌侧深							C2-C3-C2-C2	C2-C2-C2-C2
3502122	2001-04-20	21	女	0	0	0	1	1	0	0	1		44ML发育沟	舌侧发育沟	舌侧发育沟				C4-C3-C1-C4	根中1/3	V3	C2-C1-C5-C5	C3-C2-C1-C4
3502164	1992-10-11	30	女	0	0	0	0	0	0	0	0	34ML发育沟				C4-C3-C3-C5	根中1/3	V5
3502253	2001-02-20	21	女	0	0	0	1	0	0	0	1			颊舌发育沟，舌侧深	舌侧发育沟							C2-C2-C2-C2	C1-C2-C2-C2
3502155	1997-10-04	25	女	1	0	0	0	1	0	0	0	34ML发育沟	44ML发育沟			C4-C3-C2-C3	根中1/3	V5	C4-C3-C2-C5	根中1/3	V5
3502150	2002-04-23	20	女	0	0	0	1	0	0	0	0			舌侧发育沟								C1-C1-C2-C4
3502058	2001-01-17	21	女	0	0	0	1	0	0	0	0			舌侧发育沟								C2-C3-C1-C4
3502007	1978-04-27	44	女	0	0	0	0	0	0	0	0
3501997	2003-07-15	19	女	0	0	0	1	1	0	0	1	34ML发育沟	44ML发育沟	颊舌发育沟，舌侧深	颊舌发育沟，舌侧深	C4-C3-C3-C3	根中1/3	V5	C4-C2-C3-C5	根中1/3	V5	C2-C3-C5-C5	C2-C2-C2-C2
3501913	2000-11-30	22	男	0	0	0	0	1	0	0	0	34ML发育沟	44ML发育沟			C4-C4-C3-C5	根中1/3	V5	C3-C3-C2-C3	根上1/3	V5
3501845	2002-03-28	20	女	0	0	0	1	1	0	0	1		44ML发育沟	颊舌发育沟，舌侧深	颊舌发育沟，舌侧深				C4-C1-C2-C3	根中1/3	V5	C2-C2-C1-C4	C2-C2-C1-C4
3501834	1994-09-25	28	女	0	0	0	0	0	0	0	1				颊舌发育沟，舌侧深								C3-C3-C2-C2
2107130001	1987-07-13	35	女	0	0	0	0	0	0	0	0
3501588	2003-05-26	19	男	0	0	0	0	0	0	0	1				舌侧发育沟								C1-C2-C1-C4
3501391	2004-08-17	18	男	1	0	0	0	1	0	0	0	34ML发育沟	44ML发育沟			C4-C3-C2-C3	根中1/3	V5	C4-C3-C3-C4	根中1/3	V5
3501325	2001-09-29	21	女	0	0	0	1	0	0	0	1			舌侧发育沟	舌侧发育沟							C1-C3-C2-C4	C1-C3-C2-C4
3501349	2002-10-10	20	男	0	0	0	0	1	0	0	1		44ML发育沟		舌侧发育沟				C4-C3-C2-C3	根中1/3	V5		C1-C3-C3-C3
3501301	2001-02-22	21	男	0	0	0	1	0	0	0	1			舌侧发育沟	舌侧发育沟							C1-C1-C1-C4	C1-C1-C1-C4
3501329	2002-12-15	20	男	0	0	0	0	0	0	0	0
3501307	1999-01-17	23	女	0	0	0	1	0	0	0	1			舌侧发育沟	舌侧发育沟							C1-C1-C1-C4	C1-C1-C1-C4
3501294	2002-11-18	20	男	0	0	0	0	0	0	0	0
3501196	1992-05-25	30	女	0	0	0	0	0	0	0	0
3501092	1994-05-25	28	女	0	0	0	1	0	0	0	1			舌侧发育沟	舌侧发育沟							C1-C2-C2-C2	C1-C2-C2-C2
3500884	2004-02-17	18	男	0	0	0	0	0	0	0	0
3500955	1998-01-02	24	女	0	0	0	0	0	0	0	0		44ML发育沟						C4-C4-C4-C4	根中1/3	V5
3500901	2001-09-29	21	女	0	0	0	1	0	0	0	1			舌侧发育沟	颊舌发育沟，舌侧深							C1-C3-C3-C2	C2-C2-C2-C2
3500843	1999-09-03	23	女	0	0	0	0	0	0	0	0
3500742	1998-12-23	24	女	0	0	0	0	0	0	0	0
3500773	1994-07-18	28	女	0	0	0	0	0	0	0	0
3500687	2003-06-12	19	女	1	0	0	0	1	0	0	0	34ML发育沟	44ML发育沟			C4-C2-C3-C3	根尖1/3	V5	C4-C3-C2-C3	根中1/3	V5
3500552	2004-01-17	18	男	0	0	0	0	0	0	0	0	34ML发育沟	44ML发育沟			C4-C3-C3-C3	根中1/3	V5	C4-C3-C3-C3	根中1/3	V5
3500541	1995-02-08	27	女	1	0	0	1	1	0	0	1	34L发育沟	44ML发育沟	颊舌发育沟，舌侧深	47舌侧发育沟	C4-C1-C4-C4	无分叉	V1	C3-C3-C2-C3	根上1/3	V5	C3-C3-C3-C2	C2-C2-C2-C2
3500547	1998-12-20	24	女	0	0	0	0	0	0	0	0	34L发育沟	44L发育沟			C4-C3-C4-C4	根中1/3	V5	C4-C4-C4-C4	无分叉	V1
3500456	1989-09-15	33	女	0	0	0	0	0	0	0	0
3500446	1982-11-12	40	女	0	0	0	0	0	0	0	0
3500412	2000-03-23	22	女	0	0	0	1	0	0	0	0			颊舌发育沟，舌侧深								C1-C3-C1-C4
3500271	2001-05-23	21	女	0	0	0	1	0	0	0	1			舌侧发育沟	舌侧发育沟							C1-C4-C4-C4	C1-C1-C1-C4
3500312	2002-11-03	20	女	0	0	0	0	0	0	0	0
3500264	1986-10-03	36	男	0	0	0	0	0	0	0	0
3500188	2002-11-22	20	男	1	0	0	0	0	0	0	1	34ML发育沟	44ML发育沟		舌侧发育沟	C3-C3-C2-C3	根上1/3	V5	C3-C3-C3-C3	根上1/3	V5		C3-C3-C3-C3
3500204	1989-10-10	33	男	0	0	0	0	0	0	0	0
3500208	2000-10-12	22	女	0	0	0	1	0	0	0	1			舌侧发育沟	颊舌发育沟，舌侧深							C1-C2-C2-C4	C1-C2-C2-C2
3500070	2002-10-29	20	男	0	0	0	0	0	0	0	0
3499848	1997-08-13	25	女	0	0	0	1	0	0	0	1			舌侧发育沟	舌侧发育沟							C1-C2-C1-C4	C1-C2-C4-C4
3499301	1992-02-25	30	女	1	0	0	1	1	0	0	1	34ML发育沟	44ML发育沟	舌侧发育沟	舌侧发育沟	C4-C1-C4-C4	无分叉	V1	C4-C1-C4-C4	无分叉	V1	C1-C2-C1-C4	C1-C2-C2-C2
3499437	2001-07-26	21	女	0	0	0	0	0	0	0	0		44ML发育沟						C4-C4-C4-C4	根中1/3	V5
3499128	2001-01-20	21	女	1	0	0	1	1	0	0	1	34ML发育沟	44ML发育沟	舌侧发育沟	舌侧发育沟	C4-C2-C3-C3	根中1/3	V5	C4-C2-C3-C3	根中1/3	V5	C1-C1-C1-C4	C1-C2-C2-C4
3499112	2002-03-22	20	女	0	0	0	1	0	0	0	1	34ML发育沟	44ML发育沟	舌侧发育沟	舌侧发育沟	C4-C4-C4-C5	根中1/3	V5	C4-C4-C5-C5	无分叉	V1	C1-C2-C5-C5	C1-C2-C2-C4
3498882	2001-12-02	21	男	0	0	0	0	0	0	0	0
3499006	1991-06-11	31	女	0	0	0	0	0	0	0	0
3498723	2003-04-10	19	女	0	0	0	1	0	0	0	1			颊舌发育沟，舌侧深	颊侧发育沟							C2-C2-C2-C2	C1-C2-C4-C4
3498848	2001-09-29	21	女	0	0	0	0	0	0	0	1				颊舌发育沟，舌侧深								C2-C3-C3-C4
3498656	1994-10-30	28	女	0	0	0	1	0	0	0	1			舌侧发育沟	舌侧发育沟							C1-C2-C2-C4	C1-C2-C1-C4
3498051	1997-10-13	25	女	0	0	0	1	0	0	0	1			颊舌发育沟，舌侧深	颊舌发育沟，舌侧深							C2-C2-C2-C2	C2-C3-C3-C4
3495766	2000-06-14	22	男	0	0	0	1	0	0	0	1			舌侧发育沟	舌侧发育沟							C1-C1-C1-C4	C1-C2-C3-C4
3497729	1985-02-02	37	女	0	0	0	1	0	0	0	0			颊舌发育沟，舌侧深								C2-C3-C2-C2
3497760	1990-04-15	32	女	0	0	0	1	0	0	0	1			舌侧发育沟	舌侧发育沟							C1-C2-C1-C4	C1-C2-C2-C2
3497643	1994-10-21	28	女	0	0	0	0	0	0	0	0
3497632	1996-12-26	26	女	0	0	0	1	0	0	0	1			舌侧发育沟	舌侧发育沟							C1-C2-C2-C1	C1-C2-C2-C4
3497427	2000-01-14	22	女	0	0	0	0	0	0	0	0
3497357	1996-04-22	26	女	0	0	0	0	0	0	0	0
3496761	1988-11-24	34	女	0	0	0	1	0	0	0	1			舌侧发育沟	舌侧发育沟							C1-C2-C2-C4	C1-C1-C2-C2
3496661	1996-06-05	26	男	0	0	0	1	1	0	0	0	34ML发育沟	44ML发育沟	颊舌发育沟，舌侧深		C3-C3-C3-C4	根上1/3	V3	C3-C2-C3-C1	根上1/3	V3	C2-C2-C2-C2
3496658	2002-03-27	20	男	0	0	0	0	0	0	0	0
3496534	1968-03-09	54	女	1	0	0	0	0	0	0	0	34L发育沟				C4-C4-C1-C4	无分叉	V1
3496428	1982-06-01	40	女	0	0	0	0	0	0	0	1				舌侧发育沟								C1-C2-C2-C2
3496386	2000-05-26	22	女	0	0	0	0	0	0	0	0
3496232	1991-05-29	31	女	0	0	0	1	0	0	0	1			舌侧发育沟	颊舌发育沟，舌侧深							C1-C2-C2-C2	C3-C2-C2-C2
3496123	1999-06-24	23	女	0	0	0	1	0	0	0	1			舌侧发育沟	舌侧发育沟							C1-C1-C4-C4	C1-C1-C4-C4
3496031	1987-01-18	35	女	0	0	0	1	0	0	0	0			舌侧发育沟								C1-C2-C2-C2
3496112	1988-05-28	34	女	0	0	0	1	0	0	0	1			舌侧发育沟	舌侧发育沟							C1-C1-C4-C4	C1-C1-C4-C4
3495821	1995-10-14	27	女	0	0	0	1	0	0	0	1			舌侧发育沟	舌侧发育沟							C2-C2-C1-C4	C2-C2-C4-C4
3495262	1995-09-01	27	女	0	0	0	1	0	0	0	1			舌侧发育沟	舌侧发育沟							C1-C2-C2-C2	C1-C2-C2-C2
3495219	1992-08-08	30	女	0	0	0	1	0	0	0	1			舌侧发育沟	舌侧发育沟							C1-C2-C2-C2	C1-C1-C2-C2
3495209	1993-05-10	29	女	0	0	0	0	0	0	0	0
3494967	2003-04-24	19	男	0	0	0	0	0	0	0	0
3494707	1994-01-15	28	女	0	0	0	1	0	0	0	1			舌侧发育沟	舌侧发育沟							C1-C2-C2-C2	C2-C2-C2-C3
3494113	2000-08-05	22	男	0	0	0	1	0	0	0	1			颊舌发育沟，舌侧深	颊舌发育沟，舌侧深							C2-C2-C1-C4	C2-C2-C1-C4
3494093	1979-10-01	43	男	0	0	0	0	1	0	0	0	34ML发育沟	44ML发育沟			C3-C3-C3-C3	根上1/3	V5	C3-C3-C3-C4	根上1/3	V5
3494029	2003-10-03	19	男	0	0	0	0	0	0	0	0
3493830	2001-08-22	21	女	0	0	0	0	0	0	0	0
3493766	1974-05-16	48	女	0	0	0	0	0	0	0	0
3493087	1988-09-20	34	女	0	0	0	0	0	0	0	0
3493226	2002-01-10	20	男	0	0	0	1	0	0	0	1			舌侧发育沟	舌侧发育沟							C1-C2-C2-C4	C1-C1-C1-C4
3492775	2000-05-27	22	女	0	0	0	0	0	0	0	0
3492749	2002-03-18	20	女	0	0	0	1	0	0	0	1			舌侧发育沟	舌侧发育沟							C1-C2-C2-C4	C1-C1-C2-C4
3492748	2004-09-27	18	男	0	0	0	0	0	0	0	0
3492538	1993-03-22	29	女	0	0	0	1	0	0	0	1			舌侧发育沟	颊舌发育沟，舌侧深							C1-C2-C2-C4	C2-C2-C2-C4
3492452	1980-04-06	42	女	0	0	0	0	0	0	0	0
3492447	1989-12-30	33	女	0	0	0	1	0	0	0	1			舌侧发育沟	颊舌发育沟，舌侧深							C3-C3-C2-C4	C2-C3-C3-C3
3492376	1990-07-20	32	女	0	0	0	0	0	0	0	0
3492371	2003-05-07	19	男	1	0	0	1	1	0	0	1	34ML发育沟	44ML发育沟	舌侧发育沟	颊舌发育沟，舌侧深	C4-C3-C2-C3	根中1/3	V5	C4-C3-C2-C3	根中1/3	V5	C1-C2-C3-C2	C1-C2-C1-C4
3492369	1999-12-02	23	女	0	0	0	0	0	0	0	0
3492013	2004-04-17	18	男	0	0	0	0	0	0	0	0
3490708	2003-06-03	19	女	0	0	0	1	0	0	0	1	34ML发育沟		舌侧发育沟	舌侧发育沟	C4-C4-C4-C4	无分叉	V1				C2-C2-C2-C2	C1-C2-C2-C2
3490963	1988-12-22	34	女	0	0	0	1	0	0	0	0			颊舌发育沟，舌侧深								C2-C2-C2-C4
3490957	1992-09-23	30	女	1	0	0	0	0	0	0	0	34ML发育沟	44ML发育沟			C4-C4-C1-C4	无分叉	V1	C4-C1-C3-C3	根中1/3	V5
3490956	1997-01-08	25	女	0	0	0	1	0	0	0	1		44ML发育沟	舌侧发育沟	颊舌发育沟，舌侧深				C4-C3-C3-C3	根中1/3	V5	C1-C1-C4-C4	C2-C2-C2-C4
3490948	2003-09-05	19	女	0	0	0	1	0	0	0	1			颊舌发育沟，舌侧深	颊舌发育沟，舌侧深							C1-C1-C1-C4	C1-C1-C1-C4
3491028	1997-06-28	25	女	0	0	0	1	0	0	0	1			颊舌发育沟，舌侧深	颊舌发育沟，舌侧深							C1-C1-C1-C4	C2-C2-C1-C4
3490966	2004-08-13	18	女	0	0	0	0	0	0	0	1				颊舌发育沟，舌侧深								C1-C3-C3-C3
3490326	2004-01-03	18	男	0	0	0	1	0	0	0	1			舌侧发育沟	舌侧发育沟							C1-C2-C2-C2	C1-C2-C3-C3
3490128	1995-02-09	27	女	0	0	0	0	0	0	0	0
3489988	1997-03-27	25	女	0	0	0	1	0	0	0	1			颊舌发育沟，舌侧深	颊舌发育沟，舌侧深							C2-C2-C3-C3	C1-C2-C3-C3
3489662	2003-08-27	19	女	0	0	0	1	0	0	0	1			舌侧发育沟	舌侧发育沟							C1-C1-C1-C4	C1-C2-C1-C1
2108230001	1993-08-23	29	女	0	0	0	1	0	0	0	1			颊舌发育沟，颊侧深	颊舌发育沟，舌侧深							C1-C1-C4-C4	C2-C2-C1-C4
3520879	1996-11-23	26	女	0	0	0	1	0	0	0	1			舌侧发育沟	舌侧发育沟							C1-C2-C2-C3	C1-C2-C2-C1
3529850	1998-06-04	24	女	0	0	0	0	0	0	0	0
3520701	1979-12-08	43	男	0	0	0	0	0	0	0	1				颊舌发育沟，舌侧深								C2-C3-C3-C3
3529672	1997-12-26	25	女	0	0	0	0	1	0	0	0		44ML发育沟						C4-C3-C2-C3	根中1/3	V5
3520524	1983-10-03	39	男	0	0	0	0	1	0	0	0		44ML发育沟						C4-C3-C2-C3	根中1/3	V5
3520482	1986-03-11	36	女	0	0	0	0	0	0	0	0
3520395	1980-07-19	42	男	1	0	0	1	0	0	0	1	34L发育沟		颊舌发育沟，舌侧深	颊舌发育沟，舌侧深	C4-C1-C4-C5	无分叉	V1				C2-C3-C2-C2	C2-C2-C2-C2
3520390	1999-06-03	23	男	1	0	0	0	0	0	0	1	34ML发育沟			颊舌发育沟，舌侧深	C4-C2-C3-C3	根中1/3	V5					C1-C2-C3-C3
3520370	1996-08-18	26	男	0	0	0	0	0	0	0	0
3520353	1980-08-11	42	男	0	0	0	0	0	0	0	0
3489426	1999-05-15	23	女	0	0	0	1	0	0	0	1			舌侧发育沟	舌侧发育沟							C1-C2-C2-C2	C2-C2-C2-C2
3489388	2000-10-18	22	女	0	0	0	1	0	0	0	1			颊舌发育沟，舌侧深	颊舌发育沟，舌侧深							C2-C2-C2-C2	C2-C3-C2-C4
3488747	1994-05-27	28	女	0	0	0	1	0	0	0	1	34ML发育沟		颊舌发育沟，舌侧深	舌侧发育沟	C4-C3-C3-C5	根中1/3	V5				C2-C3-C3-C3	C1-C2-C2-C2
3488461	1960-01-16	62	女	0	0	0	0	0	0	1	1				颊舌发育沟，舌侧深								C2-C3-C3-C3
3488618	2001-07-25	21	女	0	0	0	1	0	0	0	1			舌侧发育沟	颊舌发育沟，舌侧深							C1-C1-C1-C4	C2-C2-C1-C1
3487810	1997-05-21	25	男	1	0	0	1	0	0	0	1	34ML发育沟		舌侧发育沟	颊舌发育沟，舌侧深	C4-C3-C1-C3	根中1/3	V5				C1-C1-C1-C4	C1-C1-C2-C2
3487928	2003-08-25	19	男	0	0	0	0	1	0	0	1		44ML发育沟		颊舌发育沟，舌侧深				C4-C3-C2-C3	根中1/3	V5		C2-C3-C3-C3
3486899	1998-10-10	24	女	0	0	0	0	0	0	0	0
3486905	2000-11-18	22	女	0	0	0	0	0	0	0	0
3486244	1999-11-10	23	女	0	0	0	1	0	0	0	1			颊舌发育沟，舌侧深	颊舌发育沟，舌侧深							C2-C3-C1-C4	C1-C2-C1-C4
3486972	2003-03-10	19	女	0	0	0	1	0	0	0	1			颊舌发育沟，舌侧深	颊舌发育沟，舌侧深							C2-C2-C1-C4	C2-C3-C4-C4
3486870	1988-02-24	34	女	0	0	0	0	0	0	0	1	34ML发育沟			颊舌发育沟，舌侧深	C4-C3-C3-C3	根中1/3	V5					C2-C3-C3-C3
3486767	2001-05-15	21	女	0	0	0	1	0	0	0	1			舌侧发育沟	舌侧发育沟							C1-C1-C1-C1	C1-C1-C1-C1
3486497	2003-05-19	19	女	0	0	0	0	0	0	0	0
3486348	2000-07-13	22	女	0	0	0	0	0	0	0	0
3485171	2000-07-09	22	女	0	0	0	0	0	0	0	0	34ML发育沟				C4-C3-C3-C3	根中1/3	V5
3485934	1994-06-18	28	女	0	0	0	1	0	0	0	1			舌侧发育沟	舌侧发育沟							C1-C1-C1-C1	C1-C1-C1-C1
3485970	1992-01-10	30	女	0	0	0	1	0	0	0	1			舌侧发育沟	舌侧发育沟							C2-C2-C2-C2	C2-C3-C5-C5
3485927	1995-08-01	27	女	0	0	0	0	0	0	0	0
3485569	1999-06-02	23	男	0	0	0	1	0	0	0	1			舌侧发育沟	舌侧发育沟							C1-C1-C1-C1	C1-C3-C2-C2
3485487	1988-09-12	34	女	0	0	0	1	0	0	0	1		44ML发育沟	舌侧发育沟	舌侧发育沟				C4-C3-C3-C3	根中1/3	V5	C4-C1-C1-C4	C4-C1-C2-C2
3521207	1992-02-19	30	男	0	0	0	0	0	0	0	0
3521165	1970-12-08	52	男	0	0	0	0	0	0	0	0
3521141	1992-12-19	30	男	0	0	0	0	0	0	0	1		44ML发育沟		舌侧发育沟				C4-C4-C4-C4	无分叉	V1		C2-C3-C3-C4
3520869	1998-12-27	24	男	1	0	0	1	1	0	0	1	34ML发育沟	44ML发育沟	舌侧发育沟	舌侧发育沟	C4-C2-C2-C5	根中1/3	V5	C4-C3-C2-C3	根中1/3	V5	C1-C2-C1-C4	C1-C3-C2-C4
3485243	1991-02-22	31	男	0	0	0	0	1	0	0	0	34ML发育沟	44ML发育沟			C4-C3-C3-C3	根中1/3	V5	C4-C3-C3-C5	根中1/3	V5
3484907	1980-10-12	42	男	0	0	0	0	0	0	0	0
2107060025	1981-07-06	41	男	0	0	0	0	1	1	0	0		44ML发育沟						C3-C3-C2-C3	根上1/3	V5
3484331	1990-03-12	32	女	0	0	0	0	0	0	0	0
3484287	1974-02-21	48	女	0	0	0	0	0	0	0	0
2107060005	1995-07-06	27	女	0	0	0	1	0	0	0	1			37颊侧发育沟	47颊侧发育沟							C1-C2-C2-C2	C4-C1-C4-C4
3483463	2003-07-09	19	男	1	0	0	1	1	0	0	1	34ML发育沟	44ML发育沟	37舌侧发育沟	47舌侧发育沟	C3-C3-C2-C3	根上1/3	V5	C3-C3-C2-C3	根上1/3	V5	C2-C3-C2-C4	C2-C3-C2-C4
3483847	1983-09-05	39	女	0	0	0	0	0	0	0	0
3483729	1998-05-19	24	男	0	0	0	0	0	0	0	0
3483359	2005-12-06	17	男	0	0	0	0	0	0	0	0	34ML发育沟	44ML发育沟			C4-C4-C4-C4	无分叉	V1	C4-C4-C4-C4	无分叉	V1
3483045	2002-08-29	20	男	1	0	0	0	1	0	0	0	34ML发育沟	44ML发育沟			C3-C3-C2-C3	根上1/3	V5	C3-C2-C3-C3	根上1/3	V5
3483032	2001-02-01	21	女	0	0	0	0	0	0	0	0	34ML发育沟	44ML发育沟			C4-C3-C3-C3	根中1/3	V5	C4-C4-C4-C4	无分叉	V1
3483053	2003-01-06	19	女	0	0	0	1	0	0	0	1			37颊侧发育沟	颊舌发育沟，舌侧深							C4-C1-C1-C4	C4-C1-C1-C4
3483006	2005-10-14	17	女	0	0	0	1	0	0	0	1			37舌侧发育沟	47舌侧发育沟							C1-C1-C1-C4	C1-C1-C1-C4
3482687	2002-10-15	20	男	0	0	0	0	0	0	0	1				47舌侧发育沟								C2-C3-C3-C4
3482703	2000-06-15	22	男	1	0	0	0	1	0	0	0	34ML发育沟	44ML发育沟			C4-C2-C3-C3	根中1/3	V5	C4-C2-C3-C3	根中1/3	V5
3482495	1999-07-15	23	女	0	0	0	1	0	0	0	1			颊舌发育沟，舌侧深	颊舌发育沟，舌侧深							C2-C2-C1-C4	C4-C1-C1-C4
3482588	2003-02-08	19	女	0	0	0	0	0	0	0	1				颊舌发育沟，舌侧深								C2-C3-C2-C2
3482104	1995-03-10	27	女	0	0	0	1	0	0	0	1			舌侧发育沟	舌侧发育沟							C1-C2-C5-C5	C1-C2-C4-C4
3481957	1998-01-06	24	男	0	0	0	0	0	0	0	0
3481867	2003-10-03	19	女	0	0	0	0	0	0	0	0	34ML发育沟	44ML发育沟			C4-C3-C3-C3	根下1/3	V5	C4-C4-C4-C4	无分叉	V1
3481253	1990-08-13	32	女	0	0	0	1	0	0	0	0			舌侧发育沟								C1-C3-C2-C4
3481422	2004-09-30	18	男	0	0	0	1	0	0	0	1			舌侧发育沟	舌侧发育沟							C1-C1-C1-C1	C1-C1-C1-C1
3481243	2002-11-21	20	女	0	0	0	1	0	0	0	1			舌侧发育沟	舌侧发育沟							C1-C2-C2-C2	C1-C2-C2-C2
3481287	2003-10-16	19	女	0	0	0	0	0	0	0	0
3481017	1988-05-31	34	女	0	0	0	1	0	0	0	1			舌侧发育沟	舌侧发育沟							C1-C3-C3-C5	C2-C3-C3-C5
3480647	2003-05-13	19	女	0	0	0	1	0	0	0	0			颊舌发育沟，舌侧深								C2-C3-C1-C4
3480455	1999-12-21	23	女	0	0	0	1	0	0	0	1			舌侧发育沟	舌侧发育沟							C1-C1-C1-C4	C2-C2-C1-C4
3480444	1971-12-06	51	女	0	0	0	0	0	0	0	1				颊舌发育沟，舌侧深								C2-C3-C5-C5
3480508	2005-08-13	17	男	0	0	0	0	0	0	0	0
3480314	2003-11-14	19	女	0	0	0	1	0	0	0	1			舌侧发育沟	舌侧发育沟							C1-C1-C1-C1	C1-C2-C2-C4
3480335	2005-10-16	17	男	0	0	0	0	0	0	0	0	34ML发育沟	44ML发育沟			C4-C3-C3-C3	根中1/3	V5	C4-C3-C3-C3	根中1/3	V5
3480330	2000-06-19	22	女	0	0	0	1	0	0	0	1			颊舌发育沟，舌侧深	颊舌发育沟，舌侧深							C1-C2-C2-C4	C1-C2-C4-C4
3479652	1982-12-14	40	男	0	0	0	1	0	0	0	1		44近中发育沟	舌侧发育沟	舌侧发育沟				C4-C1-C4-C4	无分叉	V1	C1-C1-C1-C4	C1-C2-C2-C4
3495766	2000-06-14	22	男	0	0	0	1	0	0	0	1			舌侧发育沟	舌侧发育沟							C4-C1-C1-C4	C1-C2-C2-C4
2107050001	1989-07-05	33	女	0	0	0	1	0	0	0	1			舌侧发育沟	舌侧发育沟							C1-C2-C5-C5	C1-C2-C2-C2
3479214	1989-07-01	33	男	1	0	0	0	0	0	0	1	34ML发育沟			47舌侧发育沟	C4-C2-C4-C5	根中1/3	V5					C1-C1-C1-C4
3478879	1993-05-16	29	女	0	0	0	0	0	0	0	1				47舌侧发育沟								C3-C3-C5-C5
3479026	1986-11-11	36	女	0	0	0	0	0	0	0	0		44ML发育沟						C4-C4-C4-C4	无分叉	V1
3478648	2004-01-03	18	女	0	0	0	1	0	0	0	1			颊舌发育沟，舌侧深	颊舌发育沟，舌侧深							C2-C2-C2-C4	C2-C2-C2-C4
3478279	2004-08-13	18	男	0	0	0	0	0	0	0	0
3478487	2003-06-02	19	男	1	0	0	1	1	0	0	0	34ML发育沟	44L发育沟	颊舌发育沟，舌侧深		C4-C3-C2-C3	根中1/3	V5	C3-C2-C2-C4	根上1/3	V5	C3-C3-C3-C3
3478388	1991-01-05	31	男	0	0	0	1	0	0	0	1			舌侧发育沟	舌侧发育沟							C1-C2-C2--C4	C1-C2-C2-C4
3477426	1971-09-15	51	女	0	0	0	1	0	0	0	1			舌侧发育沟	舌侧发育沟							C1-C3-C3-C2	C1-C3-C3-C4
3476983	2004-10-04	18	女	0	0	0	1	0	0	0	0			舌侧发育沟								C1-C1-C1-C4
3476811	1998-01-01	24	女	0	0	0	0	0	0	0	0
3476846	1990-01-01	32	女	0	0	0	1	0	0	0	0	ML发育沟		舌侧发育沟		C4-C3-C3-C5	根中1/3	V5				C1-C2-C3-C5
3475900	2005-03-07	17	男	0	0	0	0	0	0	0	0
3476746	1988-12-18	34	女	0	0	0	0	0	0	0	1				颊舌发育沟，舌侧深								C2-C2-C2-C4
3475894	1996-11-21	26	女	0	0	0	1	0	0	0	1	34ML发育沟	44ML发育沟	舌侧发育沟	舌侧发育沟	C4-C4-C4-C5	根尖1/3	V5	C4-C4-C1-C4	无分叉	V1	C1-C1-C1-C4	C2-C2-C1-C4
3476598	1974-11-16	48	女	0	0	0	1	1	0	0	1	34ML发育沟	44ML发育沟	舌侧发育沟	舌侧发育沟	C3-C3-C3-C4	根上1/3	V3	C3-C3-C2-C3	根上1/3	V5	C2-C1-C1-C4	C2-C2-C3-C4
3476590	1990-11-07	32	女	0	0	0	1	0	0	0	1			颊舌发育沟，舌侧深	颊舌发育沟，舌侧深							C2-C2-C4-C4	C4-C2-C2-C4
3476369	1994-02-28	28	女	0	0	0	1	0	0	0	0		44ML发育沟	颊舌发育沟，舌侧深					C4-C3-C3-C5	根尖1/3	V5	C2-C3-C4-C4
3476409	1981-04-03	41	女	0	0	0	0	0	0	0	0
3476326	1996-06-04	26	女	1	0	0	1	0	0	0	1	ML发育沟	ML发育沟	舌侧发育沟	舌侧发育沟	C3-C1-C3-C3	根上1/3	V5	C3-C3-C2-C3	根上1/3	V5	C1-C1-C1-C4	C1-C2-C1-C4
3475908	1995-02-15	27	女	0	0	0	1	0	0	0	1			舌侧发育沟	舌侧发育沟							C1-C2-C4-C4	C1-C2-C4-C4
3475664	2004-05-14	18	男	0	0	0	1	0	0	0	1			舌侧发育沟	舌侧发育沟							C1-C2-C3-C3	C2-C3-C3-C3
3475726	1992-03-08	30	女	0	0	0	1	0	0	0	0			颊舌发育沟，舌侧深								C2-C2-C3-C4
3475766	1994-09-05	28	女	0	0	0	0	0	0	0	1				颊舌发育沟，舌侧深								C1-C2-C2-C4
3475321	1987-07-08	35	女	0	0	0	1	0	0	0	1			颊舌发育沟，舌侧深	舌侧发育沟							C2-C2-C3-C3	C2-C2-C2-C4
3475312	2001-08-10	21	女	0	0	0	1	0	0	0	1			舌侧发育沟	舌侧发育沟							C1-C2-C2-C3	C1-C2-C3-C3
3475267	1989-06-17	33	男	0	0	0	0	0	0	0	1				舌侧发育沟								C2-C3-C5-C5
3474662	2003-01-01	19	男	1	0	0	1	0	0	0	1	34ML发育沟	44ML发育沟	颊舌发育沟，舌侧深	舌侧发育沟	C4-C2-C3-C3	根中1/3	V5	C4-C3-C2-C2	根中1/3	V5	C2-C2-C2-C4	C1-C2-C3-C2
3474508	1966-07-22	56	女	0	0	0	0	0	0	0	0
3474289	1993-09-17	29	男	0	0	0	1	0	0	0	1			舌侧发育沟	舌侧发育沟							C1-C1-C1-C1	C1-C1-C2-C2
3525979	1993-06-23	29	女	0	0	0	0	0	0	0	0
3525967	2001-04-30	21	男	1	0	0	0	0	0	0	0	34ML发育沟				C4-C3-C2-C3	根中1/3	V5
3525776	1991-09-08	31	男	0	0	0	1	0	0	0	1			颊舌发育沟，舌侧深	颊舌发育沟，舌侧深							C2-C2-C1-C1	C2-C3-C2-C1
3525264	2005-04-25	17	男	0	0	0	0	1	0	0	1		44ML发育沟		颊舌发育沟，舌侧深				C4-C2-C2-C4	根中1/3	V5		C2-C2-C2-C1
3526026	2003-10-21	19	女	0	0	0	1	0	0	0	1		44ML发育沟，	舌侧发育沟	舌侧发育沟				C4-C4-C4-C4	无分叉	V1	C1-C1-C4-C4	C1-C2-C3-C3
3525997	2003-05-16	19	女	1	0	0	1	1	0	0	1	34ML发育沟	44ML发育沟	舌侧发育沟	舌侧发育沟	C4-C3-C2-C5	根中1/3	V5	C4-C2-C2-C3	根中1/3	V5	C1-C2-C2-C3	C3-C3-C2-C2
3525724	2003-02-06	19	女	0	0	0	1	0	0	0	1			颊舌发育沟，舌侧深	颊舌发育沟，舌侧深							C1-C3-C2-C4	C1-C3-C2-C4
3525660	1981-07-29	41	女	0	0	0	1	0	0	0	1			舌侧发育沟	舌侧发育沟							C1-C2-C2-C4	C1-C2-C2-C3
3525539	2005-01-20	17	女	0	0	0	1	0	0	0	1			舌侧发育沟	舌侧发育沟							C1-C2-C2-C4	C1-C2-C2-C2-
3525574	2001-02-27	21	男	0	0	0	1	0	0	0	0			舌侧发育沟								C1-C2-C2-C1
3525305	1993-01-04	29	男	0	0	0	0	0	0	0	0
3525312	2000-04-08	22	女	0	0	0	0	0	0	0	0
3525265	1997-10-17	25	女	0	0	0	0	0	0	0	0
3525134	1992-03-25	30	男	0	0	0	0	0	0	0	0
3525080	1995-10-07	27	女	0	0	0	1	0	0	0	1	34ML发育沟		舌侧发育沟	舌侧发育沟	C4-C3-C3-C5	根中1/3	V5				C1-C1-C4-C4	C1-C1-C4-C4
3525093	1997-10-17	25	女	0	0	0	1	0	0	0	1			舌侧发育沟	舌侧发育沟							C2-C2-C1-C4	C2-C2-C4-C4
3524945	2001-09-21	21	女	0	0	0	0	0	0	0	1	34ML发育沟	44ML发育沟		舌侧发育沟	C4-C3-C3-C3	根中1/3	V5	C4-C3-C3-C3	根中1/3	V5		C1-C2-C2-C4
3524951	1997-02-11	25	女	0	0	0	1	0	0	0	1	34L发育沟	44ML发育沟	舌侧发育沟	颊舌发育沟，舌侧深	C4-C4-C4-C4	无分叉	V1	C4-C3-C2-C3	根中1/3	V5	C2-C2-C1-C4	C2-C3-C2-C2
3524797	2004-01-15	18	男	1	0	0	1	1	0	0	1	34ML发育沟	44ML发育沟	舌侧发育沟	舌侧发育沟	C3-C2-C2-C4	根上1/3	V3	C3-C2-C3-C4	根上1/3	V3	C2-C3-C2-C4	C2-C2-C1-C4
3524735	2002-11-04	20	男	0	0	0	1	0	0	0	1			颊舌发育沟，舌侧深	颊舌发育沟，舌侧深							C2-C3-C3-C3	C2-C2-C4-C4
2108310001	1968-08-31	54	女	0	0	0	0	0	0	0	0
3524212	1984-10-24	38	男	0	0	0	1	0	0	0	1			颊舌发育沟，舌侧深	颊舌发育沟，舌侧深							C1-C1-C2-C4	C1-C2-C1-C4
3524340	2001-07-25	21	女	0	0	0	0	0	0	0	0
3524329	1999-02-02	23	男	0	0	0	1	0	0	0	1			舌侧发育沟	舌侧发育沟							C1-C2-C3-C2	C1-C2-C2-C3
3524406	2000-04-08	22	女	0	0	0	0	0	0	0	0
3524307	1988-02-01	34	女	0	0	0	0	0	0	0	0
3524204	2003-07-08	19	男	0	0	0	0	0	0	0	0
3524004	2002-03-06	20	女	0	0	0	1	0	0	0	1			颊舌发育沟，舌侧深	颊舌发育沟，舌侧深							C2-C1-C4-C4	C2-C2-C2-C2
3523991	1999-12-16	23	男	0	0	0	1	0	0	0	1	34L发育沟		舌侧发育沟	舌侧发育沟	C4-C4-C5-C5	无分叉	V1				C1-C2-C4-C4	C1-C2-C3-C3
3523909	1974-07-12	48	女	0	0	0	1	0	0	0	1			舌侧发育沟	舌侧发育沟							C3-C3-C5-C5	C2-C2-C3-C3
3523872	1985-03-18	37	女	1	0	0	1	0	0	0	0	34L发育沟	L发育沟	颊舌发育沟，舌侧深		C4-C1-C4-C5	根中1/3	V5	C4-C4-C3-C4	根中1/3	V5	C1-C1-C4-C4
3523867	1988-06-15	34	女	0	0	0	0	0	0	0	0
3523856	1993-05-10	29	女	0	0	0	0	0	0	0	0
3523766	1995-05-07	27	女	1	0	0	0	1	0	0	0	34ML发育沟	ML发育沟			C4-C1-C4-C4	无分叉	V1	C4-C2-C3-C5	根中1/3	V5
3523746	1995-07-20	27	男	0	0	0	1	0	0	0	1			颊舌发育沟，舌侧深	颊舌发育沟，舌侧深							C2-C2-C1-C4	C2-C2-C1-C4
3526486	1998-08-14	24	男	0	0	0	1	0	0	0	0	34ML发育沟	ML发育沟	颊舌发育沟，舌侧深		C3-C3-C3-C3	根上1/3	V5	C4-C3-C3-C3	根中1/3	V5	C1-C2-C3-C3
3523689	2005-01-05	17	男	0	0	0	0	0	0	0	0
3523658	1996-11-06	26	女	0	0	0	0	0	0	0	0
3526508	1993-07-24	29	女	0	0	0	0	0	0	0	0	34舌侧发育沟	ML发育沟			C4-C4-C4-C4	根尖1/3	V5	C4-C4-C4-C4	无分叉	V1
3526498	1997-04-05	25	男	0	0	0	0	0	0	0	0
3526468	1960-02-14	62	女	0	0	0	0	0	0	0	0
3526398	2002-05-13	20	女	0	0	0	0	0	0	0	1	34L发育沟			颊舌发育沟，舌侧深	C4-C4-C5-C5	无分叉	V1					C2-C3-C2-C4
3526252	1994-09-02	28	女	0	0	0	1	0	0	1	1			舌侧发育沟	47舌侧发育沟							C2-C3-C3-C3	C1-C2-C3-C3
3526391	2002-04-16	20	女	0	0	0	0	0	0	0	1				颊舌发育沟，舌侧深								C2-C2-C1-C4
3526263	2003-10-08	19	女	0	0	0	1	0	0	0	1			颊舌发育沟，舌侧深	颊舌发育沟，舌侧深							C1-C1-C1-C1	C2-C2-C2-C2
3526258	2000-12-29	22	女	0	0	0	0	0	0	0	0
3526183	2001-12-03	21	男	1	0	0	0	1	0	0	0	34L发育沟	L发育沟			C4-C1-C3-C4	根中1/3	V3	C4-C2-C3-C4	根中1/3	V3
3526152	2001-02-25	21	女	0	0	0	1	0	0	0	1	34ML发育沟		舌侧发育沟	舌侧发育沟	C3-C3-C3-C3	根上1/3	V5				C1-C2-C3-C4	C1-C2-C2-C4
3523619	1995-07-18	27	男	0	0	0	1	0	0	0	1		44ML发育沟	舌侧发育沟	舌侧发育沟				C4-C4-C3-C5	根尖1/3	V5	C2-C2-C2-C4	C2-C2-C3-C3
3523596	1998-07-17	24	女	0	0	0	1	1	0	0	1	34ML和颊侧发育沟	ML和颊侧发育沟	颊舌发育沟，舌侧深	舌侧发育沟	C3-C3-C5-C5	根上1/3	V5	C3-C3-C3-C5	根上1/3	V5	C2-C2-C4-C4	C1-C2-C1-C4
3523595	2003-06-09	19	男	1	0	0	0	1	0	0	1	34ML发育沟	ML发育沟		47舌侧发育沟	C4-C2-C2-C4	根中1/3	V5	C4-C3-C2-C1	根中1/3	V3		C2-C3-C2-C4
3523537	1998-07-02	24	女	0	0	0	1	0	0	0	1	34ML发育沟		37舌侧发育沟深	47舌侧沟发育沟	C4-C3-C3-C5	根中1/3	V5				C2-C3-C3-C3	C2-C3-C3-C3
3523512	1992-04-24	30	女	0	0	0	1	0	0	0	1			颊舌发育沟，舌侧深	舌侧发育沟							C2-C3-C3-C3	C2-C3-C3-C3
3523484	1996-06-27	26	女	0	0	0	0	0	0	0	0	34ML发育沟	ML发育沟			C4-C4-C4-C4	无分叉	V1	C4-C4-C3-C3	根中1/3	V5
3523474	1994-10-19	28	女	0	0	0	0	0	0	0	1				47舌侧发育沟								C1-C2-C2-C2
3523424	1988-07-18	34	女	0	0	0	1	0	0	0	1			37舌侧发育沟	舌侧发育沟							C1-C1-C1-C4	C2-C2-C1-C4
3523325	1984-01-01	38	男	0	0	0	1	0	0	0	1			舌侧发育沟	舌侧发育沟							C1-C1-C1-C4	C2-C3-C4-C4
3523211	1996-02-26	26	男	0	0	0	0	0	0	0	1				47舌侧发育沟								C2-C2-C2-C1
3523467	1993-04-30	29	女	0	0	0	1	0	0	0	0			颊舌发育沟，舌侧深								C2-C3-C3-C3
3523104	2002-09-23	20	女	0	0	0	0	0	0	0	1				47舌侧发育沟								C4-C4-C2-C2
3523018	1992-07-16	30	女	0	0	0	1	0	0	0	1			舌侧发育沟	舌侧发育沟							C1-C2-C4-C4	C1-C1-C4-C4
3523031	2004-07-23	18	女	0	0	0	0	1	0	0	1	34ML和颊侧发育沟	44ML和颊侧发育沟		舌侧发育沟	C3-C3-C3-C3	根上1/3	V5	C3-C3-C2-C4	根上1/3	V3		C2-C3-C3-C3
3522956	2000-12-03	22	女	1	0	0	0	0	0	0	1	34L发育沟			47舌侧发育沟	C4-C4-C1-C4	无分叉	V1					C2-C3-C1-C4
3523118	1984-03-13	38	女	0	0	0	0	0	0	0	0
3523106	1999-03-07	23	女	1	0	0	1	0	0	0	1	34ML发育沟	ML发育沟	颊舌发育沟，舌侧深	舌侧发育沟	C4-C2-C3-C4	根中1/3	V3	C4-C2-C3-C4	根中1/3	V5	C2-C2-C2-C4	C1-C2-C1-C2
3523089	1994-11-10	28	女	0	0	0	1	0	0	0	1			舌侧发育沟	舌侧发育沟							C1-C2-C1-C4	C2-C1-C1-C4
3526970	1991-06-25	31	男	0	0	0	0	0	0	0	0
3527071	2001-06-22	21	男	0	0	0	0	0	0	0	0
3541868	2001-05-30	21	男	0	0	0	0	1	0	0	1		44ML发育沟		舌侧发育沟				C4-C3-C3-C4	根中1/3	V5		C3-C2-C1-C4
3541798	2000-01-03	22	女	0	0	0	0	0	0	0	1				47舌侧沟								C1-C2-C2-C2
3539093	1993-01-21	29	男	0	0	0	1	0	0	0	1			舌侧发育沟	颊舌发育沟，舌侧深							C1-C1-C1-C4	C1-C2-C1-C4
3539637	1998-02-18	24	男	0	0	0	0	0	0	0	0	34ML发育沟	44ML发育沟			C4-C3-C3-C3	根中1/3	V5	C4-C3-C2-C3	根中1/3	V5
3542829	1999-12-27	23	男	0	0	0	0	0	0	0	0
3542812	1989-07-29	33	女	0	0	0	1	0	0	0	1			舌侧发育沟	舌侧发育沟							C1-C1-C1-C4	C2-C2-C1-C4
3542608	1983-09-21	39	女	0	0	0	1	0	0	0	1			颊舌发育沟，舌侧深	颊舌发育沟，舌侧深							C2-C3-C2-C4	C2-C3-C2-C4
3542516	2000-04-10	22	女	0	0	0	1	1	0	0	1	34ML发育沟	44ML发育沟	37舌侧发育沟	颊舌发育沟，舌侧深	C4-C4-C4-C4	无分叉	V1	C4-C3-C2-C3	根中1/3	V5	C2-C3-C2-C4	C2-C2-C2-C2
3542550	1980-01-27	42	女	0	0	0	1	0	0	0	1			舌侧发育沟	舌侧发育沟							C3-C3-C3-C3	C2-C3-C5-C5
3542541	2004-03-21	18	女	0	0	0	1	0	0	0	0			颊舌发育沟，舌侧深								C1-C2-C3-C3
3542507	1995-06-13	27	男	0	0	0	0	0	0	0	0
3542463	1992-01-26	30	女	0	0	0	0	0	0	0	0		44ML发育沟						C4-C3-C3-C3	根中1/3	V5
3542465	1989-07-04	33	男	0	0	0	0	0	0	0	0
3542328	2003-09-24	19	女	0	0	0	0	0	0	0	1				颊舌发育沟，舌侧深								C2-C2-C1-C4
3542248	1994-08-10	28	男	0	0	0	1	0	0	0	1			37舌侧发育沟	47舌侧发育沟							C1-C2-C2-C4	C1-C2-C3-C3
3542310	2003-08-25	19	女	0	0	0	1	0	0	0	1			37舌侧发育沟	47舌侧发育沟							C1-C1-C1-C1	C2-C3-C4-C4
3542253	2004-10-25	18	女	0	0	0	1	0	0	1	0			37舌侧发育沟								C1-C1-C1-C1
3543081	1990-03-15	32	女	0	0	0	1	0	0	0	1			37舌侧发育沟	47舌侧发育沟							C1-C2-C2-C4	C1-C2-C2-C1
3543155	1998-11-10	24	女	0	0	0	0	0	0	0	0	34ML发育沟	ML发育沟			C4-C4-C4-C4	无分叉	V1	C4-C4-C4-C4	无分叉	V1
3543077	2000-10-09	22	女	0	0	0	1	0	0	0	1			37舌侧发育沟	47舌侧发育沟							C1-C2-C2-C2	C2-C2-C1-C4
3543012	2003-09-12	19	女	0	0	0	0	0	0	0	1				47舌侧发育沟								C1-C1-C1-C4
3543067	1992-08-09	30	女	0	0	0	1	0	0	0	1			37舌侧发育沟	颊舌发育沟，舌侧深							C1-C1-C1-C4	C1-C1-C1-C4
3542972	1998-10-10	24	女	0	0	0	1	0	0	0	1	34ML发育沟	44ML发育沟	37舌侧发育沟	47舌侧发育沟	C4-C3-C3-C3	根中1/3	V3	C3-C3-C3-C3	根上1/3	V5	C1-C2-C2-C3	C1-C2-C1-C4
3542960	2002-08-05	20	女	0	0	0	0	0	0	0	1				颊舌发育沟，舌侧深								C1-C2-C2-C4
3542937	1999-04-15	23	男	0	0	0	0	0	0	0	0
3542788	2003-05-01	19	女	0	0	0	1	0	0	0	1			颊舌发育沟，舌侧深	颊舌发育沟，舌侧深							C1-C1-C1-C4	C1-C1-C1-C4
3542703	2000-03-14	22	女	0	0	0	1	0	0	0	1	34ML发育沟		舌侧发育沟	舌侧发育沟	C4-C4-C4-C4	无分叉	V1				C2-C2-C2-C4	C2-C3-C3-C3
3545410	1992-10-20	30	女	0	0	0	0	0	0	0	0
3545206	1992-08-11	30	女	0	0	0	1	0	0	0	1			舌侧发育沟	舌侧发育沟							C1-C1-C2-C4	C1-C1-C2-C3
3545022	1996-11-25	26	女	0	0	0	1	0	0	0	1			颊舌发育沟，舌侧深	颊舌发育沟，舌侧深							C1-C1-C1-C4	C1-C2-C1-C4
3545229	2003-02-01	19	男	0	0	0	0	0	0	0	1				颊舌发育沟，舌侧深								C2-C3-C3-C3
3545101	1997-04-06	25	女	0	0	0	1	0	0	0	1			37舌侧发育沟	47舌侧发育沟							C2-C3-C2-C4	C1-C2-C3-C3
3545065	2003-03-13	19	女	0	0	0	1	1	0	0	1	34ML发育沟	44ML发育沟	37颊舌发育沟，舌侧深	47颊舌发育沟，舌侧深	C4-C3-C3-C4	根下1/3	V3	C4-C2-C1-C4	根尖1/3	V3	C1-C1-C1-C4	C2-C1-C1-C4
3545050	1996-05-30	26	女	0	0	0	1	0	0	0	1			舌侧发育沟	舌侧发育沟							C1-C3-C3-C3	C2-C3-C2-C4
3544897	2004-01-05	18	男	0	0	0	0	0	0	0	0
3544800	1989-05-20	33	女	0	0	0	1	0	0	0	1			舌侧发育沟	舌侧发育沟							C1-C2-C1-C4	C2-C3-C3-C3
3544461	1994-08-11	28	女	0	0	0	1	0	0	0	1			舌侧发育沟	舌侧发育沟							C1-C2-C3-C3	C1-C3-C3-C3
3544683	1992-05-08	30	女	0	0	0	1	0	0	0	1			舌侧发育沟	舌侧发育沟							C1-C2-C4-C4	C1-C2-C4-C4
3544658	1991-01-21	31	女	0	0	0	1	0	0	0	0			颊舌发育沟，舌侧深								C2-C2-C4-C4
3544633	2002-11-04	20	女	0	0	0	1	0	0	0	1			舌侧发育沟	舌侧发育沟							C1-C2-C4-C4	C1-C2-C3-C3
3544474	1983-11-27	39	女	0	0	0	1	0	0	0	1	34ML发育沟	44ML发育沟	舌侧发育沟	舌侧发育沟	C4-C3-C3-C3	根中1/3	V5	C4-C4-C4-C4	无分叉	V1	C2-C3-C3-C3	C1-C2-C3-C3
3544397	1998-12-19	24	男	0	0	0	0	0	0	0	0
3544376	1999-09-26	23	女	0	0	0	1	0	0	0	0			颊舌发育沟，舌侧深								C2-C3-C2-C4
3544215	1995-11-13	27	男	0	0	0	0	0	0	0	0
3544147	2000-07-28	22	女	0	0	0	0	0	0	0	1				颊舌发育沟，舌侧深								C1-C2-C3-C4
3544163	1987-11-26	35	女	0	0	0	1	0	0	0	1			舌侧发育沟	舌侧发育沟							C4-C1-C1-C4	C4-C1-C1-C4
3544082	2002-12-04	20	女	0	0	0	0	0	0	0	1				颊舌发育沟，舌侧深								C1-C1-C2-C4
3544011	1990-08-02	32	女	0	0	0	1	0	0	0	0			舌侧发育沟								C1-C3-C5-C5
3543933	1998-08-05	24	女	0	0	0	0	0	0	0	0	ML发育沟	ML发育沟			C3-C3-C3-C3	根上1/3	V5	C3-C3-C3-C3	根上1/3	V5
3543901	2003-03-11	19	男	0	0	0	1	0	0	0	1			舌侧发育沟	舌侧发育沟							C1-C1-C1-C4	C2-C2-C1-C4
3543600	1991-11-02	31	女	0	0	0	0	0	0	0	0
3543689	1988-07-16	34	女	0	0	0	1	0	0	0	1			颊舌发育沟，舌侧深	颊舌发育沟，舌侧深							C2-C3-C3-C3	C3-C3-C3-C3
3543638	1994-02-10	28	女	0	0	0	0	0	0	0	0
3543604	1999-03-06	23	女	0	0	0	0	0	0	0	0
3543466	2005-09-08	17	女	0	0	0	0	0	0	0	0
3543266	2003-07-29	19	男	0	0	0	0	0	0	0	0
3543435	1994-08-25	28	女	0	0	0	1	0	0	0	1			颊舌发育沟，舌侧深	颊舌发育沟，舌侧深							C2-C2-C3-C3	C2-C3-C3-C3
3543358	1999-01-29	23	男	0	0	0	0	0	0	0	0
3543283	1965-02-09	57	女	0	0	0	1	0	0	0	0			颊舌发育沟，舌侧深								C2-C2-C2-C2
3543273	1993-06-08	29	男	0	0	0	1	0	0	0	0			37舌侧发育沟								C1-C2-C3-C3
3543250	1987-12-22	35	女	0	0	0	1	0	0	0	1			舌侧发育沟	舌侧发育沟							C1-C3-C3-C3	C1-C2-C3-C3
3543177	1999-02-09	23	女	0	0	0	0	0	0	0	1				47舌侧发育沟								C1-C1-C1-C1
3523308	2003-01-24	19	女	0	0	0	0	0	0	0	0
3471366	1998-07-22	24	女	0	0	0	1	0	0	0	0			颊舌发育沟，舌侧深								C1-C2-C2-C3
3471048	1999-03-17	23	女	0	0	0	1	0	0	0	1			舌侧发育沟	舌侧发育沟							C2-C2-C2-C2	C2-C2-C1-C4
3470988	1986-07-20	36	女	0	0	0	0	0	0	0	0
3471067	1998-04-13	24	女	0	0	0	1	0	0	0	1			颊舌发育沟，舌侧深	颊舌发育沟，舌侧深							C1-C1-C2-C3	C1-C1-C2-C2
3471009	2003-08-31	19	女	0	0	0	0	0	0	0	0
3470813	1991-12-09	31	男	0	0	0	0	0	0	0	0
3469676	1999-03-30	23	女	0	0	0	0	0	0	0	0
3470604	1995-07-23	27	女	0	0	0	0	0	0	0	0
3470607	1993-01-02	29	女	0	0	0	0	0	0	0	1		44ML发育沟		舌侧发育沟				C4-C4-C4-C4	无分叉	V1		C1-C2-C1-C4
3470310	2001-08-08	21	女	0	0	0	1	0	0	0	1			舌侧发育沟	舌侧发育沟							C1-C1-C2-C3	C1-C2-C2-C2
3469674	1999-03-04	23	男	0	0	0	0	0	0	0	0	34ML发育沟	ML发育沟			C4-C3-C3-C3	根尖1/3	V5	C4-C3-C3-C3	根中1/3	V3
3469690	1998-01-16	24	男	0	0	0	0	0	0	0	0	ML发育沟	ML发育沟			C3-C3-C3-C3	根上1/3	V5	C4-C4-C4-C4	无分叉	V1
3469667	1990-09-15	32	女	0	0	0	1	0	0	0	1			37舌侧发育沟	颊舌发育沟，舌侧深							C1-C2-C3-C3	C2-C2-C2-C2
3469366	1966-06-21	56	女	0	0	0	1	0	0	0	1			舌侧发育沟	舌侧发育沟							C1-C2-C2-C2	C2-C2-C2-C3
3469148	2004-01-17	18	男	1	0	0	0	0	0	0	1	ML发育沟	ML发育沟		颊舌发育沟，舌侧深	C4-C3-C2-C3	根尖1/3	V5	C4-C4-C4-C3	根尖1/3	V5		C2-C2-C2-C2
3468917	1999-11-02	23	女	0	0	0	1	0	0	0	0	34L发育沟	44L发育沟	37舌侧发育沟		C4-C4-C4-C4	根中1/3	V5	C4-C4-C4-C4	无分叉	V1	C2-C3-C3-C3
3468698	1988-10-01	34	女	0	0	0	1	0	0	0	1			37舌侧发育沟	47舌侧发育沟							C2-C1-C4-C4	C1-C2-C1-C4
3468669	1997-04-08	25	女	0	0	0	0	0	0	0	0	34ML发育沟				C4-C3-C3-C3	根中1/3	V5
3468475	1994-02-14	28	男	0	0	0	0	0	0	0	0
3467890	2002-02-09	20	女	0	0	0	1	0	0	0	1			舌侧发育沟	舌侧发育沟							C4-C1-C1-C4	C1-C1-C2-C4
3467182	1998-03-10	24	女	0	0	0	1	0	0	0	1			37舌侧发育沟	颊舌发育沟，舌侧深							C1-C1-C1-C4	C1-C1-C4-C4
3467341	1993-04-24	29	男	0	0	0	0	0	0	0	0	34ML发育沟	44ML发育沟			C4-C3-C3-C3	根中1/3	V5	C3-C3-C3-C3	根上1/3	V5
3467289	2003-01-11	19	男	0	0	0	0	0	0	0	0
3466876	1972-12-09	50	女	0	0	0	1	0	0	0	1			舌侧发育沟	舌侧发育沟							C1-C1-C2-C3	C1-C2-C2-C3
3466267	1997-11-17	25	男	1	0	0	0	1	0	0	0	ML发育沟	ML发育沟			C3-C3-C1-C5	根上1/3	V5	C3-C4-C1-C3	根上1/3	V5
3466008	1998-09-19	24	女	0	0	0	1	0	0	0	0			37舌侧发育沟								C4-C1-C2-C3
3465578	1997-02-18	25	女	0	0	0	1	0	0	0	1	34ML发育沟	44ML发育沟	颊舌发育沟，舌侧深	舌侧发育沟	C4-C4-C3-C3	根中1/3	V5	C4-C4-C4-C4	无分叉	V1	C2-C3-C3-C3-	C1-C3-C3-C3
3465350	2003-04-08	19	男	1	0	0	0	1	0	0	0	34ML发育沟	44ML发育沟			C4-C3-C1-C4	根中1/3	V3	C4-C3-C1-C4	根中1/3	V3
3464868	1987-01-18	35	女	0	0	0	0	0	0	0	0
3464537	1997-03-12	25	男	0	0	0	0	0	0	0	0
3464417	1992-09-28	30	女	0	0	0	0	0	0	0	0
3464086	1998-08-18	24	女	0	0	0	1	0	0	0	1			舌侧发育沟	舌侧发育沟							C1-C2-C2-C2	C1-C2-C1-C4
3463597	2004-11-05	18	女	0	0	0	1	0	0	0	1		44ML发育沟	颊舌发育沟，舌侧深	47舌侧发育沟				C4-C3-C3-C4	根中1/3	V3	C2-C2-C1-C4	C1-C2-C1-C1
3463629	1999-06-03	23	女	0	0	0	1	0	0	0	1			37舌侧发育沟	颊舌发育沟，舌侧深							C1-C2-C4-C4	C1-C1-C1-C4
3462061	1996-12-21	26	女	0	0	0	0	0	0	0	0
3463332	2002-02-17	20	男	0	0	0	1	0	0	0	1			37舌侧发育沟	颊舌发育沟，舌侧深							C1-C2-C2-C2	C1-C2-C2-C2
3462572	1991-06-01	31	女	0	0	0	1	0	0	0	1			37舌侧发育沟	颊舌发育沟，舌侧深							C2-C2-C1-C4	C3-C2-C2-C2
3461887	2000-01-11	22	女	1	0	0	0	1	0	0	0	34ML发育沟	44ML发育沟			C4-C2-C3-C3	根中1/3	V5	C4-C3-C2-C3	根中1/3	V5
3462229	2004-10-03	18	男	1	0	0	1	1	0	0	1	34ML发育沟	44ML发育沟	37舌侧发育沟	47舌侧发育沟	C4-C3-C2-C4	根中1/3	V5	C4-C3-C2-C4	根中1/3	V3	C1-C1-C1-C4	C1-C2-C1-C4
3462057	1972-06-05	50	女	0	0	0	1	0	0	0	0			颊舌发育沟，舌侧深								C2-C2-C2-C2
	1997-12-10	25	男	0	0	0	0	0	0	0	0
3462053	1995-01-23	27	男	0	0	0	0	0	0	0	0
3461740	1989-12-27	33	男	0	0	0	0	0	0	0	0
3461727	1996-07-03	26	女	0	0	0	1	0	0	0	1			37舌侧发育沟	颊舌发育沟，舌侧深							C2-C2-C5-C5	C2-C2-C3-C3
3461653	2002-12-27	20	男	0	0	0	1	0	0	0	1	34ML发育沟	44ML发育沟	37舌侧发育沟	颊舌发育沟，舌侧深	C4-C3-C3-C5	根中1/3	V5	C4-C3-C3-C3	根中1/3	V5	C1-C2-C2-C4	C1-C2-C3-C2
3461239	2002-10-28	20	女	0	0	0	1	0	0	0	1			37舌侧发育沟	47舌侧发育沟							C1-C1-C4-C4	C1-C2-C2-C4
3461252	1987-10-21	35	女	0	0	0	0	0	0	0	0
3460728	1989-06-18	33	女	0	0	0	1	0	0	0	1			37舌侧发育沟	47舌侧发育沟							C1-C1-C1-C4	C4-C1-C1-C1
3460396	1988-07-09	34	女	0	0	0	1	0	0	0	1			37舌侧发育沟	47舌侧发育沟							C1-C2-C4-C4	C1-C2-C2-C4
3460304	1999-11-27	23	男	0	0	0	1	0	0	0	1			颊舌发育沟，舌侧深	颊舌发育沟，舌侧深							C1-C1-C2-C2	C3-C2-C2-C2
3460294	2002-08-06	20	男	1	0	0	0	0	0	0	0	34ML发育沟	44ML发育沟			C4-C3-C2-C4	根中1/3	V3	C4-C3-C2-C3	根中1/3	V5
3460293	1994-05-12	28	女	0	0	0	0	0	0	0	0
3460253	1997-08-28	25	女	0	0	0	1	0	0	0	1			37舌侧发育沟	47舌侧发育沟							C1-C2-C1-C4	C1-C2-C1-C4
3460032	2003-02-26	19	女	0	0	0	0	0	0	0	0
3459928	2001-05-17	21	男	0	0	0	0	0	0	0	0
3459529	2002-10-02	20	女	0	0	0	1	0	0	0	1			37舌侧发育沟	47舌侧发育沟							C1-C1-C4-C4	C1-C1-C4-C4
3459498	1987-05-26	35	女	0	0	0	1	0	0	0	1			颊舌发育沟，舌侧深	颊舌发育沟，舌侧深							C2-C2-C3-C3	C2-C3-C2-C4
3459307	1998-08-18	24	男	0	0	0	1	0	0	0	1			颊舌发育沟，舌侧深	颊舌发育沟，舌侧深							C2-C3-C2-C1	C2-C2-C1-C4
3459330	1984-03-09	38	女	0	0	0	0	0	0	0	0
3459182	2004-10-02	18	女	0	0	1	0	0	0	0	1				47舌侧发育沟								C1-C3-C2-C4
3458973	1989-07-20	33	女	0	0	0	1	0	0	0	1			37舌侧发育沟	47舌侧发育沟							C1-C2-C2-C1	C2-C2-C2-C1
3458884	1985-07-10	37	男	0	0	0	0	0	0	0	0
3458856	1980-02-08	42	女	0	0	0	1	0	0	0	1			颊舌发育沟，舌侧深	颊舌发育沟，舌侧深							C2-C2-C1-C4	C2-C2-C1-C4
3458492	1996-12-10	26	男	0	0	0	1	0	0	0	1	34ML发育沟		37舌侧发育沟	47舌侧发育沟	C4-C4-C4-C4	无分叉	V1				C1-C2-C3-C3	C1-C3-C3-C3
3458507	2001-11-06	21	男	0	0	1	0	0	0	0	0	34ML发育沟	44ML发育沟			C4-C4-C4-C4	无分叉	V1	C4-C3-C3-C3	根中1/3	V5
3458359	2004-08-27	18	男	0	0	0	0	0	0	0	0
3458266	1994-07-09	28	男	0	0	0	0	0	0	0	0
3458152	1992-11-01	30	女	0	0	0	1	0	0	0	1			颊舌发育沟，舌侧深	颊舌发育沟，舌侧深							C2-C3-C3-C3	C2-C3-C3-C3
3457782	2003-06-15	19	女	0	0	0	1	0	0	0	1			颊舌发育沟，舌侧深	颊舌发育沟，舌侧深							C2-C2-C2-C2	C2-C2-C2-C2
3457914	2000-07-31	22	女	0	0	0	1	0	0	0	0			颊舌发育沟，舌侧深								C2-C2-C2-C3
3458151	1993-04-17	29	女	0	0	0	0	0	0	0	0
3457122	1991-06-08	31	女	0	0	0	0	0	0	0	0	34ML发育沟	44ML发育沟			C4-C4-C4-C4	无分叉	V1	C4-C4-C4-C4	无分叉	V1
3456555	1990-12-26	32	女	0	0	0	1	0	0	0	1	34ML发育沟		37舌侧发育沟	47舌侧发育沟	C4-C4-C4-C4	无分叉	V1				C1-C1-C1-C4	C1-C1-C1-C4
3456252	1996-09-01	26	女	0	0	0	1	0	0	0	1			37舌侧发育沟	47舌侧发育沟							C1-C2-C1-C4	C1-C2-C2-C4
3456146	2002-10-15	20	男	0	0	0	0	0	0	0	1				颊舌发育沟，舌侧深								C2-C2-C2-C2
3456128	1997-04-10	25	女	0	0	0	1	0	0	0	1			颊舌发育沟，舌侧深	颊舌发育沟，舌侧深							C2-C3-C1-C4	C1-C2-C2-C2
3455534	1992-09-17	30	女	0	0	0	1	0	0	0	1			37舌侧发育沟	47舌侧发育沟							C4-C1-C1-C4	C4-C1-C4-C4
3455469	1997-01-02	25	男	0	0	0	0	0	0	0	0	34ML发育沟	44ML发育沟			C3-C3-C3-C3	根上1/3	V5	C3-C3-C2-C3	根上1/3	V5
3455389	2003-06-20	19	女	0	0	0	0	1	0	0	0		44ML发育沟						C4-C3-C2-C3	根中1/3	V5
3455120	1998-02-21	24	女	0	0	0	0	0	0	0	0
3455328	2004-04-19	18	女	0	0	0	1	0	0	0	1			37舌侧发育沟	47舌侧发育沟							C1-C2-C3-C3	C1-C2-C2-C3
3455146	1992-08-26	30	男	0	0	0	1	0	0	0	1			颊舌发育沟，舌侧深	舌侧发育沟							C1-C2-C2-C3	C1-C1-C2-C2
3454193	1982-04-01	40	男	0	0	0	0	0	0	0	0
3454806	2000-06-18	22	女	0	0	0	1	0	0	0	1			37舌侧发育沟	47舌侧发育沟							C1-C1-C1-C4	C1-C1-C1-C4
3454188	1997-01-17	25	女	0	0	0	1	0	0	0	1			37舌侧发育沟	47舌侧发育沟							C1-C1-C2-C4	C1-C1-C1-C4
3454001	1998-11-04	24	女	0	0	0	0	1	0	0	0		44ML发育沟						C4-C1-C4-C4	无分叉	V1
3453999	2004-01-12	18	男	0	0	0	0	0	0	0	1	34ML发育沟			47舌侧发育沟	C4-C4-C4-C4	无分叉	V1					C1-C1-C1-C4
3453263	2003-03-13	19	女	0	0	0	1	0	0	0	1			颊舌发育沟，舌侧深	47舌侧发育沟							C2-C2-C2-C2	C2-C2-C1-C4
3453229	1994-01-08	28	女	0	0	0	1	0	0	0	1			颊舌发育沟，舌侧深	颊舌发育沟，颊侧深							C2-C2-C2-C2	C2-C2-C2-C2
210626005	2000-06-26	22	女	0	0	0	1	0	0	0	1	34ML发育沟		37舌侧发育沟	47舌侧发育沟	C4-C4-C3-C5	根中1/3	V5				C4-C1-C4-C4	C4-C1-C1-C4
3452612	2000-04-30	22	女	0	0	0	1	0	0	0	1			颊舌发育沟，舌侧深	颊舌发育沟，舌侧深							C4-C1-C2-C4	C4-C2-C2-C4
3452621	1993-06-22	29	女	0	0	0	0	0	0	0	0
3452629	1999-08-17	23	男	0	0	0	0	0	0	0	0
3451994	2003-07-07	19	女	0	0	0	1	0	0	0	1	34ML发育沟		37舌侧发育沟	47舌侧发育沟	C4-C4-C4-C4	无分叉	V1				C1-C1-C1-C4	C1-C1-C1-C1
3452167	1997-12-25	25	男	0	0	0	0	0	0	0	1				47舌侧发育沟								C1-C1-C1-C1
3451956	1982-09-18	40	男	0	0	0	0	0	0	0	0	34ML发育沟	44ML发育沟			C4-C4-C4-C4	无分叉	V1	C4-C4-C4-C4	无分叉	V1
3452006	1989-09-13	33	男	0	0	0	1	0	0	0	1			37舌侧发育沟	47舌侧发育沟							C1-C2-C3-C3	C1-C3-C3-C3
3451949	1987-02-20	35	男	0	0	0	0	0	0	0	0
3537223	1998-05-23	24	女	0	0	0	1	0	0	0	1			37舌侧发育沟	47舌侧发育沟							C1-C2-C3-C4	C2-C2-C3-C3
3451741	1995-12-27	27	女	0	0	0	1	0	0	0	1			37舌侧发育沟	47舌侧发育沟							C4-C1-C2-C5	C1-C2-C1-C4
3451738	1996-08-28	26	女	1	0	0	0	0	0	0	0	34ML发育沟	44ML发育沟			C4-C2-C3-C3	根中1/3	V5	C4-C3-C2-C3	根中1/3	V5
3451768	1989-12-30	33	男	1	0	0	0	1	0	0	0	34ML发育沟	44ML发育沟			C3-C2-C2-C3	根上1/3	V5	C3-C1-C2-C5	根上1/3	V5
3451686	1990-04-19	32	女	0	0	0	0	0	0	0	1				47舌侧发育沟								C1-C2-C3-C3
3451726	1998-07-17	24	女	0	0	0	1	0	0	0	0			颊舌发育沟，舌侧深								C4-C1-C2-C4
3451687	1987-09-06	35	女	0	0	0	1	0	0	0	0			37舌侧发育沟								C1-C2-C1-C4
3451389	2002-11-13	20	女	0	0	0	0	0	0	0	0
3451368	1999-03-10	23	男	0	0	0	0	0	0	0	0
3451043	1994-11-17	28	男	0	0	0	1	0	0	0	1			颊舌发育沟，舌侧深	颊舌发育沟，舌侧深							C1-C2-C2-C4	C2-C2-C2-C2
3451037	1989-06-25	33	男	0	0	0	0	0	0	0	0
3451188	2004-04-01	18	女	0	0	0	1	0	0	0	1			37舌侧发育沟	舌侧发育沟							C1-C1-C1-C4	C1-C1-C1-C1
2106260001	2002-06-26	20	男	0	0	0	1	0	0	0	1			颊舌发育沟，舌侧深	47舌侧发育沟							C2-C2-C1-C4	C1-C1-C1-C1
3451060	1989-02-01	33	女	0	0	0	0	0	0	0	0		44ML发育沟						C4-C4-C4-C4	无分叉	V1
3450951	1971-10-16	51	女	0	0	0	0	0	0	0	0
3450722	1997-07-10	25	女	0	0	0	1	0	0	0	1	34ML发育沟		37舌侧发育沟	47舌侧发育沟	C4-C4-C4-C4	根尖1/3	V5				C1-C1-C1-C4	C1-C1-C1-C4
3450711	1996-07-05	26	男	0	0	0	0	0	0	0	0
3536697	1993-11-27	29	男	0	0	0	0	0	0	0	0
3450526	2004-08-28	18	男	0	0	0	0	0	0	0	0
3450154	1988-12-22	34	男	0	0	0	0	0	0	0	0
3449374	2002-10-14	20	男	1	1	0	0	1	0	0	0	34ML发育沟	44ML发育沟			C3-C3-C2-C3	根上1/3	V5	C3-C3-C2-C3	根上1/3	V5
3449410	1983-01-09	39	男	1	0	0	0	1	0	0	0	34ML发育沟	44ML发育沟			C3-C3-C2-C3	根上1/3	V5	C3-C1-C3-C3	根上1/3	V5
3448547	1995-12-20	27	女	0	0	0	1	0	0	0	1			颊舌发育沟，舌侧深	颊舌发育沟，舌侧深							C4-C1-C2-C4	C4-C2-C2-C4
3448844	2003-09-26	19	男	1	0	0	1	1	0	0	1	34ML发育沟	44ML发育沟	颊舌发育沟，舌侧深	颊舌发育沟，舌侧深	C3-C3-C2-C3	根上1/3	V5	C3-C3-C2-C3	根上1/3	V5	C3-C3-C3-C3	C2-C3-C3-C3
3448710	1997-11-19	25	男	0	0	0	0	0	0	0	0
3447390	2001-11-07	21	女	1	0	0	0	1	0	0	0	34ML发育沟	44ML发育沟			C3-C3-C2-C4	根上1/3	V3	C3-C3-C2-C4	根上1/3	V3
2106240004	1998-06-24	24	女	0	0	0	0	0	0	0	0	34ML发育沟				C4-C3-C3-C3	根中1/3	V5
3447489	1992-03-27	30	女	0	0	0	0	0	0	0	0
3447172	1990-07-08	32	男	0	0	0	0	0	0	0	0
3447229	1997-08-10	25	女	0	0	0	0	0	0	0	0
3447094	1993-03-21	29	女	0	0	0	0	0	0	0	0	34ML发育沟	44ML发育沟			C4-C3-C3-C3	根中1/3	V5	C4-C3-C3-C3-	根中1/3	V5
3446890	2004-06-25	18	男	0	0	0	0	0	0	0	1				47舌侧发育沟								C1-C1-C2-C2
3446683	2003-02-25	19	女	0	0	0	1	0	0	0	0			37颊舌发育沟，舌侧深								C1-C1-C3-C4
3446749	1987-08-13	35	女	0	0	0	1	0	0	0	0			37舌侧发育沟								C1-C1-C1-C4
3446521	1989-01-30	33	女	0	0	0	1	0	0	0	1			颊舌发育沟，舌侧深	颊舌发育沟，舌侧深							C2-C2-C2-C2	C2-C2-C3-C3
3446342	2002-04-15	20	女	0	0	0	0	0	0	0	1		44ML发育沟		颊舌发育沟，舌侧深				C4-C4-C4-C4	无分叉	V1		C2-C2-C3-C3
3445921	1993-03-12	29	女	0	0	0	1	0	0	0	1			37舌侧发育沟	47舌侧发育沟							C2-C3-C3-C3	C1-C4-C1-C3
3446073	1972-09-03	50	男	0	0	0	0	0	0	0	0
3445524	1991-11-22	31	女	0	0	0	1	0	0	0	1			颊舌发育沟，舌侧深	颊舌发育沟，颊侧深							C2-C2-C2-C2	C2-C2-C2-C2
3445188	1984-04-11	38	女	0	0	0	0	0	0	0	1				颊舌发育沟，舌侧深								C3-C3-C3-C3
3445166	1996-10-28	26	女	0	0	0	0	0	0	0	0
3445126	2001-06-06	21	女	0	0	0	1	0	0	0	1			37舌侧发育沟	47舌侧发育沟							C1-C1-C1-C4	C1-C1-C2-C2
2106230003	2003-06-23	19	男	0	1	0	0	0	0	0	0	34ML发育沟				C4-C3-C3-C3	根中1/3	V5
3444808	1995-10-14	27	女	0	0	0	0	0	0	0	0		44ML发育沟						C4-C4-C4-C4	无分叉	V1
3444707	2002-04-07	20	男	0	0	0	0	0	0	0	0
3443762	1997-06-23	25	女	0	0	0	0	0	0	0	0
3444516	1997-03-21	25	男	0	0	0	1	0	0	0	1			37颊舌发育沟，舌侧深	47舌侧发育沟							C1-C1-C2-C2	C1-C2-C2-C3
3444319	1998-03-18	24	男	0	0	0	0	0	0	0	0
3443944	1998-01-24	24	女	0	0	0	0	0	0	0	0
3444332	2000-05-13	22	女	0	0	0	0	0	0	0	1				颊舌发育沟，舌侧深								C2-C3-C3-C3
3444292	2000-05-04	22	女	0	0	0	0	0	0	0	0
3443928	1990-10-20	32	女	0	0	0	0	0	0	0	0
3443469	1989-11-26	33	女	0	0	0	0	0	0	0	0
3443279	1989-05-10	33	女	0	0	0	1	0	0	0	1			37舌侧发育沟	47舌侧发育沟							C1-C1-C3-C3	C1-C1-C1-C4
3443277	2003-01-01	19	男	0	0	0	0	0	0	0	0
3442761	2002-04-28	20	女	0	0	0	0	0	0	0	1				颊舌发育沟，舌侧深								C2-C2-C2-C2
3442110	1994-11-07	28	女	0	0	0	0	0	0	0	1				47舌侧发育沟								C1-C1-C2-C2
3441928	1997-03-16	25	女	0	0	0	0	0	0	0	0
3441812	1992-03-12	30	女	0	0	0	1	0	0	0	0			37舌侧发育沟								C4-C1-C2-C2
3441770	2002-12-28	20	女	0	0	0	1	0	0	0	0			37颊舌发育沟，舌侧深								C1-C2-C2-C2
3441586	2002-01-12	20	女	0	0	0	0	0	0	0	0		44ML发育沟						C4-C3-C3-C3	根中1/3	V5
3441480	2002-11-22	20	女	0	0	0	1	0	0	0	1			37舌侧发育沟	颊舌发育沟，舌侧深							C1-C1-C1-C1	C2-C2-C2-C2
3441494	2004-10-09	18	男	0	0	0	0	0	0	0	0
3441227	1995-11-02	27	女	0	0	0	1	0	0	0	1			37舌侧发育沟	47舌侧发育沟							C1-C2-C2-C4	C1-C2-C2-C2
3441355	2000-01-15	22	男	0	0	0	0	0	0	0	0
3440793	2002-07-28	20	女	0	0	0	1	0	0	0	1			37舌侧发育沟	47舌侧发育沟							C1-C1-C1-C4	C1-C2-C2-C4
3440654	1993-10-13	29	女	0	0	0	0	0	0	0	0	34ML发育沟	44ML发育沟			C4-C4-C4-C4	无分叉	V1	C4-C4-C4-C1	无分叉	V1
3440432	1999-07-02	23	女	0	0	0	0	0	0	0	0
3440427	1989-12-15	33	女	0	0	0	1	0	0	0	1			37颊舌发育沟，舌侧深	颊舌发育沟，舌侧深							C1-C3-C3-C4	C2-C3-C2-C2
3439988	1998-01-06	24	女	0	0	0	1	0	0	0	1			37舌侧发育沟	47舌侧发育沟							C4-C1-C2-C2	C4-C1-C2-C2
3439868	1996-08-09	26	女	0	0	0	1	0	0	0	0			颊舌发育沟，舌侧深								C2-C3-C3-C3
3439790	1999-07-16	23	男	0	0	0	0	0	0	0	0	34ML发育沟				C4-C3-C3-C3	根中1/3	V5
3439470	1995-11-16	27	女	0	0	0	0	0	0	0	1				颊舌发育沟，舌侧深								C2-C2-C2-C2
3438986	2003-02-19	19	女	0	0	0	0	0	0	0	0
3438519	1995-02-10	27	男	0	0	0	0	0	0	0	0
3438754	2002-01-31	20	女	0	0	0	0	0	0	0	0
3438524	1997-07-18	25	男	0	0	0	0	0	0	0	0
3437986	1987-12-06	35	女	0	0	0	1	0	0	0	0			37颊舌发育沟，舌侧深								C2-C2-C2-C2
3437891	1989-07-20	33	女	0	0	0	1	0	0	0	1			37舌侧发育沟	47舌侧发育沟							C1-C3-C3-C3	C2-C3-C3-C3
3437370	1997-08-24	25	女	0	0	0	0	0	0	0	0
3437606	2003-05-14	19	女	0	0	0	1	0	0	0	0			37颊舌发育沟，舌侧深								C1-C2-C3-C4
3437346	1999-03-12	23	男	1	0	0	0	0	1	0	0	34L发育沟	44L发育沟			C4-C4-C1-C4	无分叉	V1	C4-C4-C4-C4	无分叉	V1
3437226	1995-06-09	27	女	0	0	0	0	0	0	0	0
3437187	1999-08-15	23	女	0	0	0	0	0	0	0	0	34ML发育沟				C4-C3-C3-C3	根中1/3	V5
3437169	2001-10-14	21	男	0	0	0	1	0	0	0	1			37颊舌发育沟，舌侧深	47舌侧发育沟							C4-C1-C3-C4	C4-C1-C3-C2
3437026	1998-09-20	24	男	0	0	0	1	0	0	0	1			37舌侧发育沟	47舌侧发育沟							C4-C1-C2-C2	C4-C1-C2-C2
3436615	1997-04-11	25	女	0	0	0	0	0	0	0	0
3436419	2000-07-31	22	女	0	0	0	1	0	0	0	0			37颊舌发育沟，舌侧深								C2-C2-C2-C2
3436403	1986-10-17	36	女	1	0	0	1	0	0	0	1	34L发育沟		颊舌发育沟，舌侧深	47舌侧发育沟	C4-C2-C3-C3	根中1/3	V5				C1-C2-C2-C2	C2-C3-C3-C3
3435549	1993-06-25	29	女	1	0	0	0	0	0	0	0	34ML发育沟				C4-C3-C2-C3	根中1/3	V5
3435350	1997-02-09	25	女	0	0	0	0	1	0	0	0	34ML发育沟	44ML发育沟			C4-C3-C3-C3	根中1/3	V5	C4-C3-C2-C3	根中1/3	V5
3434607	1995-03-20	27	男	0	0	0	0	0	0	0	0		44ML发育沟						C4-C3-C5-C5	根中1/3	V5
3423031	1998-08-24	24	女	0	0	0	0	0	0	0	0
3434268	1984-10-23	38	男	0	0	0	0	0	0	0	0
3433906	2003-06-01	19	女	0	0	0	0	1	0	0	0	34ML发育沟	44ML发育沟			C4-C4-C4-C4	无分叉	V1	C4-C1-C3-C3	根中1/3	V5
3433444	2002-11-06	20	女	0	0	0	0	0	0	0	1				47舌侧发育沟								C1-C1-C1-C4
3433293	2000-02-20	22	女	0	0	0	0	0	0	0	0
3433127	1999-02-23	23	男	0	0	0	0	1	0	0	0		44ML发育沟						C4-C4-C1-C4	无分叉	V1
3431866	1999-08-22	23	女	1	0	0	1	0	0	1	1	34ML发育沟	44ML发育沟	颊舌发育沟，舌侧深	颊舌发育沟，颊侧深	C4-C3-C2-C3	根中1/3	V5	C4-C4-C4-C4	无分叉	V1	C1-C2-C2-C2	C2-C2-C2-C2
3431966	2002-05-22	20	女	0	0	0	1	0	0	0	1			37舌侧发育沟	47舌侧发育沟							C1-C1-C1-C4	C1-C2-C2-C1
3432126	2000-03-27	22	女	0	0	0	1	0	0	0	1			37舌侧发育沟	47舌侧发育沟							C1-C1-C2-C1	C2-C1-C1-C1
3431467	1998-01-23	24	女	0	0	0	1	0	0	0	1			37颊舌发育沟，舌侧深	47舌侧发育沟							C4-C1-C2-C4	C4-C1-C2-C4
3430790	1999-02-07	23	女	0	0	0	1	0	0	0	1			颊舌发育沟，舌侧深	47舌侧发育沟							C1-C2-C2-C4	C1-C1-C2-C4
3430727	2002-08-08	20	男	0	0	0	0	0	0	0	0
2109200003	1997-09-20	25	女	0	0	0	0	0	0	0	1	34ML发育沟	44ML发育沟		颊舌发育沟，舌侧深	C4-C4-C4-C4	无分叉	V1	C4-C4-C4-C4	无分叉	V1		C1-C2-C3-C2
3548006	1992-11-11	30	女	0	0	0	1	0	0	0	1			颊舌发育沟，舌侧深	颊舌发育沟，舌侧深							C2-C3-C3-C3	C2-C3-C3-C3
3547950	1995-03-04	27	女	0	0	0	1	0	0	0	1			37舌侧发育沟	47舌侧发育沟							C1-C2-C2-C2	C1-C2-C2-C4
3547914	1998-12-05	24	女	1	0	0	1	0	0	0	0	34ML发育沟		颊舌发育沟，舌侧深		C4-C2-C1-C4	根尖1/3	V3				C1-C2-C2-C4
3547883	1991-09-16	31	女	0	0	0	0	0	0	0	0
3547838	1994-01-24	28	男	0	0	0	1	0	0	0	1			37舌侧发育沟	47舌侧发育沟							C2-C2-C3-C2	C2-C3-C1-C4
3547809	1992-11-11	30	女	0	0	0	0	0	0	0	0
3547648	1999-03-10	23	女	0	0	0	1	0	0	0	1			37舌侧发育沟	47舌侧发育沟							C4-C2-C2-C2	C1-C2-C2-C2
3547558	1997-03-08	25	女	0	0	0	0	0	0	0	0
3547507	1987-06-12	35	男	0	0	0	0	0	0	0	0
3547425	2003-12-01	19	女	0	0	0	0	0	0	0	0
3547436	1998-08-11	24	女	0	0	0	0	0	0	0	0
3547413	1987-09-27	35	女	0	0	0	1	0	0	0	1			37舌侧发育沟	47舌侧发育沟							C1-C1-C2-C4	C1-C1-C2-C4
3546547	1997-08-07	25	女	0	0	0	0	0	0	0	0
	1997-11-30	25	女	0	0	0	0	0	0	0	0
3428307	2000-09-02	22	女	0	0	0	1	0	0	0	1			37舌侧发育沟	颊舌发育沟，舌侧深							C4-C1-C2-C2	C4-C1-C2-C2
3429487	1995-10-23	27	男	0	0	0	0	0	0	0	0
3428144	1998-06-27	24	女	1	0	0	0	0	0	0	0	34ML发育沟	44L发育沟			C4-C3-C2-C3	根中1/3	V5	C4-C4-C4-C4	无分叉	V1
3428817	2000-06-20	22	男	0	0	0	1	0	0	0	1			37舌侧发育沟	47舌侧发育沟							C2-C3-C2-C4	C1-C2-C1-C4
3428837	2003-03-26	19	女	0	0	0	1	0	0	0	1			颊舌发育沟，舌侧深	47舌侧发育沟							C1-C1-C2-C2	C1-C2-C1-C4
3428836	2001-12-05	21	男	0	0	0	0	0	0	0	0
3428681	1998-06-14	24	男	1	0	0	1	1	0	0	1	34ML发育沟	44ML发育沟，C形根	37颊舌发育沟，舌侧深	颊舌发育沟，舌侧深	C4-C3-C2-C3	根中1/3	V5	C4-C3-C2-C3	根中1/3	V5	C1-C3-C2-C2	C3-C3-C1-C4
3428461	2002-09-29	20	男	1	0	0	0	1	0	0	0	34ML发育沟	44ML发育沟			C4-C1-C3-C3	根中1/3	V5	C3-C2-C1-C3	根上1/3	V5
3450755	1992-08-13	30	男	0	0	0	1	0	0	0	0			37舌侧发育沟								C1-C1-C1-C1
3428266	2000-01-20	22	女	0	0	0	1	0	0	0	1			37舌侧发育沟	47舌侧发育沟							C1-C1-C4-C4	C1-C1-C1-C4
3428166	1996-04-26	26	女	0	0	0	1	0	0	0	1	34ML发育沟		37舌侧发育沟	47舌侧发育沟	C4-C3-C5-C5	根中1/3	V5				C1-C2-C3-C3	C1-C2-C2-C2
3427407	1992-03-14	30	女	0	0	0	0	1	0	0	0	34ML发育沟	44ML发育沟			C4-C4-C4-C4	无分叉	V1	C4-C3-C1-C3	根中1/3	V5
3427188	2003-11-08	19	女	1	0	0	0	1	0	0	0	34L发育沟	44ML发育沟			C4-C4-C2-C3	根尖1/3	V5	C4-C3-C2-C5	根尖1/3	V5
3426643	2003-08-28	19	女	0	0	0	0	0	0	0	1				颊舌发育沟，舌侧深								C1-C2-C1-C4
3426486	1981-04-01	41	女	0	0	0	0	0	0	0	0
3426528	2003-06-10	19	女	1	0	0	0	1	0	0	0	34ML发育沟，	44ML发育沟			C4-C2-C3-C4	根中1/3	V3	C4-C2-C2-C3	根中1/3	V5
3426341	1986-10-21	36	女	0	0	0	1	0	0	0	1			颊舌发育沟，舌侧深	颊舌发育沟，舌侧深							C2-C2-C2-C2	C2-C2-C2-C4
3426200	2002-11-04	20	男	1	0	0	1	1	0	0	1	34ML发育沟	44ML发育沟	37舌侧发育沟	47舌侧发育沟	C4-C1-C2-C3	根中1/3	V5	C3-C1-C2-C1	根上1/3	V7	C1-C2-C2-C2	C1-C2-C2-C2
3426406	2003-04-09	19	男	0	0	0	1	0	0	0	1			37舌侧发育沟	颊舌发育沟，舌侧深							C1-C2-C2-C2	C2-C3-C2-C2
3426247	2003-11-01	19	男	0	0	0	0	0	0	0	1	34ML发育沟	44ML发育沟		颊舌发育沟，舌侧深	C3-C3-C3-C3	根上1/3	V5	C3-C3-C3-C3	根上1/3	V5		C1-C2-C2-C2
3426226	1988-09-02	34	女	0	0	0	1	1	0	0	1		44L发育沟	37舌侧发育沟	颊舌发育沟，舌侧深				C4-C1-C4-C4	无分叉	V1	C1-C2-C1-C4	C2-C3-C2-C2
3556106	1997-03-27	25	女	0	0	0	0	0	0	0	0	34ML发育沟	44ML发育沟			C4-C3-C3-C3	根中1/3	V5	C4-C3-C3-C3	根中1/3	V5
3556097	1986-01-15	36	女	0	0	0	0	0	0	0	0
3556059	1992-05-13	30	女	0	0	0	1	0	0	0	1			37舌侧发育沟	47舌侧发育沟							C1-C1-C1-C1	C1-C1-C2-C2
3556012	2001-08-30	21	女	1	0	0	1	0	0	0	1	34ML及颊侧发育沟		37舌侧发育沟	47舌侧发育沟	C4-C3-C2-C3	根中1/3	V5				C1-C3-C2-C2	C1-C2-C2-C2
3555872	1997-08-20	25	女	0	0	0	1	0	0	0	1			37舌侧发育沟	47舌侧发育沟							C1-C2-C2-C2	C1-C2-C2-C2
3555744	1995-08-16	27	男	0	0	0	0	0	0	0	0
3555657	2003-03-18	19	女	0	0	0	0	0	0	0	0
3555481	1998-08-29	24	男	0	0	0	0	0	0	0	0
3555635	1999-01-18	23	女	0	0	0	1	0	0	0	1			37舌侧发育沟	颊舌发育沟，舌侧深							C1-C2-C2-C2	C1-C2-C2-C2
3555599	1991-06-04	31	女	0	0	0	0	0	0	0	0	34颊侧及近中发育沟	44ML及颊侧发育沟			C4-C3-C3-C3	根上1/3	V5	C4-C4-C5-C5	无分叉	V1
3555551	1996-10-22	26	女	0	0	0	0	1	0	0	0	34ML发育沟	44L发育沟			C4-C3-C3-C3	根中1/3	V5	C3-C2-C2-C3	根上1/3	V5
3555496	2002-09-05	20	女	0	0	0	0	0	0	0	0
3555186	1978-11-10	44	女	0	0	0	1	0	0	0	1			37舌侧发育沟	颊舌发育沟，舌侧深							C2-C2-C2-C2	C1-C2-C2-C2
3555095	1981-12-05	41	男	0	0	0	0	0	0	0	0
3554961	2001-01-18	21	男	0	0	0	1	0	0	0	1			37舌侧发育沟	47舌侧发育沟							C1-C1-C1-C1	C1-C1-C1-C1
2109270001	2000-09-27	22	女	0	0	0	0	0	0	0	0
3554840	1980-11-14	42	女	0	0	0	1	0	0	0	1			37舌侧发育沟	47舌侧发育沟							C1-C1-C4-C4	C1-C1-C2-C4
3554769	2000-12-23	22	女	0	0	0	1	0	0	0	0			37颊舌发育沟，舌侧深								C2-C3-C2-C4
3554682	2000-03-11	22	男	0	0	0	1	0	0	0	0		44ML发育沟	颊舌发育沟，舌侧深					C4-C4-C3-C3	根尖1/3	V5	C2-C2-C2-C2
3554613	1989-06-10	33	女	0	0	0	1	0	0	0	1			颊舌发育沟，舌侧深	颊舌发育沟，舌侧深							C2-C2-C2-C2	C1-C2-C2-C2
3554398	1995-12-19	27	女	0	0	0	0	0	0	0	0
3554206	1972-02-02	50	女	0	0	0	0	0	0	0	0
3554101	1986-07-20	36	女	0	0	0	1	0	0	0	1			37舌侧发育沟	47舌侧发育沟							C2-C2-C2-C2	C1-C1-C3-C3
3554139	1992-10-25	30	女	0	0	1	0	0	0	1	0
3554119	1990-10-10	32	女	0	0	0	1	0	0	0	1			37舌侧发育沟	颊舌发育沟，舌侧深							C1-C1-C1-C4	C4-C2-C1-C4
3554020	2002-02-21	20	男	0	0	0	1	0	0	0	0			37舌侧发育沟								C1-C1-C2-C2
3553975	1985-09-08	37	女	0	0	0	0	0	0	0	0
3553948	1988-02-28	34	女	0	0	0	0	0	0	0	0
3553881	2003-01-04	19	男	0	0	0	1	0	0	0	1	34ML发育沟		37舌侧发育沟	47舌侧发育沟	C4-C3-C3-C3	根中1/3	v5				C4-C1-C2-C2	C1-C2-C1-C4
3553722	1995-12-16	27	女	0	0	0	1	0	0	0	1			37舌侧发育沟	47舌侧发育沟							C1-C2-C2-C2	C1-C2-C2-C2
3553389	1981-11-08	41	女	0	0	0	0	0	0	0	0	34ML发育沟				C4-C3-C3-C3	根中1/3	V5
3553648	1993-01-07	29	女	0	0	0	1	0	0	0	1			颊舌发育沟，舌侧深	47舌侧发育沟							C1-C2-C2-C2	C1-C1-C1-C2
3553465	1999-06-07	23	女	0	0	0	0	0	0	0	0
3553529	1972-02-05	50	女	0	0	0	0	0	0	0	0
3553419	1978-05-11	44	女	0	0	0	1	0	0	0	1			颊舌发育沟，舌侧深	颊舌发育沟，舌侧深							C2-C2-C2-C2	C1-C2-C2-C2
3558802	1990-08-08	32	女	0	0	0	0	0	0	0	0
3552941	2001-01-26	21	女	0	0	0	1	0	0	0	0			37颊舌发育沟，舌侧深								C4-C1-C1-C4
3552909	1999-06-20	23	女	0	0	0	0	0	0	0	0
3552867	2002-01-03	20	女	0	0	0	1	0	0	0	1			颊舌发育沟，舌侧深	颊舌发育沟，舌侧深							C4-C1-C2-C2	C4-C1-C3-C3
3552812	1975-07-26	47	女	0	0	0	0	0	0	0	0		44ML发育沟						C4-C4-C4-C4	无分叉	V1
3552764	1997-06-19	25	女	0	0	0	0	0	0	0	0
3552668	1997-08-16	25	女	0	0	0	0	0	0	0	0
3552670	1997-09-15	25	男	0	0	0	0	0	0	0	0
3552561	1997-11-17	25	女	0	0	0	1	1	0	0	0	34ML发育沟	44ML发育沟，C形根	颊舌发育沟，舌侧深		C4-C3-C3-C3	根中1/3	V3	C4-C3-C2-C3	根中1/3	V5	C2-C3-C3-C3
3552551	1997-08-20	25	女	0	0	0	1	0	0	0	1			37舌侧发育沟	47舌侧发育沟							C1-C1-C2-C4	C1-C2-C1-C4
3552467	1993-12-15	29	女	0	0	0	1	0	0	0	1			37舌侧发育沟	47舌侧发育沟							C1-C1-C1-C4	C1-C1-C1-C4
3552368	1996-11-02	26	女	0	0	0	1	0	0	0	1			37舌侧发育沟	47舌侧发育沟							C1-C2-C2-C4	C1-C2-C2-C4
3552392	1989-04-01	33	女	0	0	0	1	0	0	0	1			37舌侧发育沟	47舌侧发育沟							C1-C3-C3-C3	C1-C2-C3-C3
3552354	1979-05-27	43	女	0	0	0	0	0	0	0	0
3552319	1990-08-20	32	男	0	0	0	0	0	0	0	0
3552330	2007-01-18	15	男	0	0	0	1	0	0	0	1			颊舌发育沟，舌侧深	颊舌发育沟，舌侧深							C2-C2-C2-C2	C2-C3-C3-C3
3551897	1999-09-03	23	女	0	0	0	0	0	0	0	0
3551919	2000-05-21	22	男	0	0	0	0	0	0	0	0
3551790	1991-08-02	31	男	0	0	0	0	0	0	0	0
3551738	1997-12-19	25	女	0	0	0	0	0	0	0	0
3551655	1983-10-27	39	女	0	0	0	0	0	0	0	0
3551632	1990-03-10	32	男	0	0	0	0	0	0	0	0		44ML发育沟						C3-C3-C3-C3	根上1/3	V5
3551583	1994-10-11	28	女	0	0	0	1	0	0	0	1			37舌侧发育沟	47舌侧发育沟							C1-C3-C3-C3	C2-C3-C3-C3
3551592	1997-04-18	25	女	0	0	0	0	0	0	0	0
3551558	1989-05-27	33	女	0	0	0	0	0	0	0	0	34ML发育沟	44ML发育沟			C4-C4-C4-C4	无分叉	V1	C4-C3-C3-C3	根中1/3	V5
3551349	1991-01-02	31	女	0	0	0	1	0	0	0	0	34ML发育沟		舌侧发育沟		C3-C3-C3-C3	根上1/3	V5				C4-C1-C4-C4
3551505	2000-02-05	22	女	0	0	0	0	0	0	0	0
3551485	1988-10-24	34	女	0	0	0	0	0	0	0	0
3551266	1995-08-11	27	女	0	0	0	1	0	0	0	1			37颊舌发育沟，舌侧深	颊舌发育沟，舌侧深							C2-C3-C3-C3	C1-C2-C2-C2
3551439	2003-08-27	19	男	0	0	0	0	0	0	0	0		44ML发育沟						C4-C4-C4-C4	无分叉	V1
2109240001	1994-09-24	28	女	0	0	0	0	1	0	0	0		颊舌发育沟，颊侧深						C4-C1-C3-C3	根中1/3	V5
3551387	1996-08-23	26	女	0	0	0	0	0	0	0	1				颊舌发育沟，舌侧深								C2-C3-C3-C3
3551286	1995-01-25	27	男	0	0	0	0	0	0	0	0
3551200	2002-01-26	20	女	0	0	0	1	0	0	0	1			37舌侧发育沟	47舌侧发育沟							C1-C2-C2-C4	C2-C2-C2-C4
3551111	1997-12-19	25	女	1	0	0	1	0	0	0	0	34ML发育沟	34ML发育沟	37舌侧发育沟		C4-C3-C2-C3	根中1/3	V5	C4-C4-C3-C5	根尖1/3	V5	C2-C2-C2-C2
3551039	1998-05-14	24	女	1	0	0	1	0	0	0	1	34ML发育沟		37舌侧发育沟	47舌侧发育沟	C4-C2-C3-C3	根尖1/3	V5				C1-C1-C1-C4	C1-C1-C1-C4
3551084	2004-01-01	18	男	0	0	0	0	1	0	0	0	34ML发育沟	44ML发育沟			C4-C3-C3-C3	根中1/3	V5	C4-C3-C2-C3	根中1/3	V5
3551077	1989-06-07	33	男	0	0	0	1	0	0	0	1			颊舌发育沟，舌侧深	颊舌发育沟，舌侧深							C2-C2-C2-C4	C4-C2-C2-C4
3551003	2002-12-11	20	女	0	0	0	0	0	0	0	0
3551002	1994-11-01	28	女	0	0	0	0	0	0	0	0
3550912	1992-02-07	30	男	0	0	0	0	0	0	0	0
3550769	1977-07-29	45	女	0	0	0	0	0	0	0	1				颊舌发育沟，舌侧深								C2-C3-C3-C3
3550794	1998-08-31	24	女	0	0	0	1	0	0	0	1	34ML发育沟	44ML发育沟，C形根	37舌侧发育沟	47舌侧发育沟	C4-C3-C3-C3	根尖1/3	V5	C4-C3-C3-C3	根中1/3	V5	C1-C2-C4-C4	C1-C1-C1-C4
3550810	1988-08-10	34	女	0	0	0	1	0	0	0	1			颊舌发育沟，舌侧深	47舌侧发育沟							C2-C2-C2-C2	C2-C2-C2-C2
3550742	1997-03-13	25	女	0	0	0	0	1	0	0	0	34ML发育沟	44ML发育沟			C4-C4-C4-C4	无分叉	V1	C4-C2-C3-C3	根中1/3	V3
3550739	2001-04-27	21	女	0	0	0	0	0	0	0	0
3550218	1996-11-17	26	男	1	0	0	1	1	0	0	1	34ML及颊侧发育沟	44ML及颊侧发育沟	37舌侧发育沟	47舌侧发育沟	C4-C1-C3-C3	根中1/3	V5	C4-C4-C1-C3	根中1/3	V5	C1-C2-C1-C4	C1-C2-C1-C4
3550129	1990-03-15	32	女	0	0	0	0	0	0	0	0
3550113	1995-08-26	27	男	0	0	0	0	0	0	0	0
3550028	1993-08-14	29	男	0	0	0	0	0	0	0	1				颊舌发育沟，舌侧深								C2-C2-C3-C4
3550053	1995-01-12	27	女	0	0	0	1	0	0	0	1			37舌侧发育沟	47舌侧发育沟							C4-C1-C2-C4	C4-C2-C1-C4
3549992	1996-02-27	26	女	0	0	0	1	1	0	0	1		44ML发育沟	37舌侧发育沟	47舌侧发育沟				C4-C3-C2-C3	根中1/3	V5	C1-C2-C4-C4	C1-C2-C1-C4
3549959	1992-10-05	30	女	0	0	0	0	0	0	0	1				颊舌发育沟，舌侧深								C2-C3-C3-C3
3549982	1998-06-03	24	男	1	0	0	0	1	0	0	0	34ML发育沟	44ML发育沟			C4-C3-C2-C3	根中1/3	V5	C4-C3-C2-C3	根中1/3	V5
3549972	2004-09-16	18	男	0	0	0	1	0	0	0	0			颊舌发育沟，舌侧深								C1-C2-C2-C2
3549771	1988-04-11	34	女	0	0	0	1	0	0	0	1			37舌侧发育沟	47舌侧发育沟							C2-C3-C2-C4	C2-C3-C2-C4
3549785	1980-10-13	42	女	0	0	0	1	0	0	0	0			37颊舌发育沟，舌侧深								C2-C3-C4-C4
3549712	1998-03-19	24	女	0	0	0	1	0	0	0	1			37颊舌发育沟，舌侧深	颊舌发育沟，舌侧深							C2-C2-C2-C2	C1-C2-C3-C3
3549488	2000-08-21	22	女	0	0	0	1	0	0	0	1			37舌侧发育沟	颊舌发育沟，舌侧深							C2-C3-C5-C5	C2-C3-C3-C3
3549380	1995-06-18	27	男	0	0	0	0	0	0	0	0
3549159	2001-09-26	21	女	0	0	0	0	0	0	0	0
3549116	1990-07-04	32	女	0	0	0	0	0	0	0	1				颊舌发育沟，舌侧深								C2-C2-C2-C2
3549057	2002-01-02	20	女	0	0	0	0	0	0	0	0
3549075	2001-01-25	21	女	0	0	0	0	0	0	0	0	34ML发育沟				C4-C3-C3-C3	根中1/3	V5
3548915	1995-08-25	27	男	0	0	0	0	0	0	0	0
3548964	2001-08-07	21	女	1	0	0	1	1	0	0	1	34ML发育沟	44ML发育沟	颊舌发育沟，舌侧深	颊舌发育沟，舌侧深	C4-C3-C2-C1	根中1/3	V5	C4-C3-C2-C3	根中1/3	V5	C2-C1-C2-C4	C4-C2-C2-C1
3548867	1995-08-09	27	男	0	0	0	1	0	0	0	0			颊舌发育沟，舌侧深								C2-C2-C1-C4
3548857	1996-12-27	26	女	0	0	0	0	0	0	0	0	34ML发育沟	44ML发育沟			C4-C4-C4-C4	无分叉	V1	C4-C4-C4-C4	无分叉	V1
3577308	1988-07-07	34	女	0	0	0	0	0	0	0	0	34ML发育沟	44ML发育沟			C4-C3-C3-C3	根中1/3	V5	C4-C4-C4-C4	无分叉	V1
3577153	1950-09-29	72	男	0	0	0	0	0	0	0	0
3577259	1986-08-22	36	女	0	0	0	1	0	0	0	0		44ML发育沟	37舌侧发育沟					C4-C4-C4-C4	无分叉	V1	C1-C2-C3-C3
3577252	2001-08-26	21	女	0	0	0	0	0	0	0	0	34ML及颊侧发育沟	44ML发育沟			C4-C3-C3-C3	根中1/3	V5	C4-C4-C4-C4	无分叉	V1
3577212	1998-08-31	24	女	0	0	0	1	0	0	0	0			颊舌发育沟，舌侧深								C2-C2-C4-C4
3577180	1995-11-29	27	女	0	0	0	0	0	0	0	0
3577120	1999-11-18	23	女	0	0	0	0	0	0	0	0
3577136	2002-02-15	20	女	0	0	0	0	0	0	0	0
3577132	1998-03-25	24	男	0	0	0	1	0	0	0	1			37舌侧发育沟	47舌侧发育沟							C1-C1-C1-C1	C1-C2-C1-C4
3577036	2001-12-16	21	女	0	0	0	0	0	0	0	0
3576887	1990-09-13	32	女	0	0	0	1	0	0	0	0			37颊舌发育沟，舌侧深								C2-C1-C4-C4
3577440	1995-06-23	27	女	0	0	0	1	0	0	0	1			37舌侧发育沟	47舌侧发育沟							C1-C1-C1-C4	C1-C1-C1-C4
3577494	1992-11-17	30	男	0	0	0	0	0	0	0	0
3577430	1999-10-16	23	女	0	0	0	0	0	0	0	0	ML发育沟	44ML发育沟			C4-C3-C3-C3	根中1/3	V5	C4-C3-C3-C3	根中1/3	V5
2110220002	1997-10-22	25	女	0	0	0	1	0	0	0	1			37舌侧发育沟	47舌侧发育沟							C2-C2-C4-C4	C1-C2-C1-C4
3576698	2001-06-27	21	男	0	0	0	0	0	0	0	1				颊舌发育沟，舌侧深								C2-C2-C2-C2
3576666	1993-07-15	29	女	0	0	0	0	0	0	0	0
3576667	1995-08-06	27	女	0	0	0	1	0	0	0	1			37舌侧发育沟	47颊舌发育沟，舌侧深							C1-C1-C1-C4	C2-C2-C1-C4
3576582	1994-07-09	28	男	1	0	0	0	1	0	0	0	ML发育沟	ML发育沟			C3-C2-C2-C3	根上1/3	V5	C3-C3-C2-C3	根上1/3	V5
3576616	1985-12-01	37	男	0	0	0	0	0	0	0	0
3576571	1988-03-01	34	女	0	0	0	0	0	0	0	0
3576531	1982-06-16	40	女	0	0	0	0	0	0	0	0
3576434	1977-10-14	45	女	0	0	0	1	0	0	0	1			37舌侧发育沟	47舌侧发育沟							C2-C2-C2-C2	C1-C2-C2-C3
2110220001	2002-10-22	20	男	1	0	0	1	0	0	0	1	34ML发育沟，	44ML发育沟	37舌侧发育沟	47舌侧发育沟	C4-C3-C2-C3	根中1/3	V5	C4-C3-C3-C3	根中1/3	V5	C1-C2-C2-C2	C1-C2-C1-C4
3576350	1994-12-05	28	女	0	0	0	1	0	0	0	1			37舌侧发育沟	47舌侧发育沟							C1-C2-C4-C4	C2-C3-C2-C4
3576321	1973-04-19	49	男	0	0	0	0	0	0	0	1				47舌侧发育沟								C2-C2-C2-C2
3576258	2000-04-20	22	女	0	0	0	0	0	0	0	0	34ML发育沟，	44ML发育沟			C4-C3-C5-C5	根中1/3	V5	C4-C4-C4-C4	无分叉	V1
3576310	1995-09-25	27	女	0	0	0	0	0	0	0	0
3576249	2000-06-12	22	女	1	0	0	0	1	0	0	0	34ML发育沟	44ML发育沟			C4-C1-C3-C3	根中1/3	V5	C4-C2-C3-C3	根中1/3	V5
3576197	1987-10-02	35	女	0	0	0	0	0	0	0	1				47颊舌发育沟，舌侧深								C2-C3-C2-C4
3576140	1994-02-07	28	男	0	0	0	0	0	0	0	0
3576102	2003-03-17	19	女	0	0	0	1	0	0	0	1			颊舌发育沟，舌侧深	颊舌发育沟，相等							C2-C3-C3-C3	C2-C3-C3-C3
3576046	2002-12-30	20	女	0	0	0	1	0	0	0	1			37舌侧发育沟	47舌侧发育沟							C2-C3-C3-C3	C2-C2-C2-C2
3575997	1994-10-02	28	女	0	0	0	1	0	0	0	1			37舌侧发育沟	47舌侧发育沟							C1-C1-C1-C4	C1-C1-C1-C4
3575977	2004-11-24	18	女	0	0	0	1	0	0	0	1			37舌侧发育沟	47舌侧发育沟							C1-C1-C1-C4	C1-C1-C4-C4
3575817	1984-03-25	38	女	0	0	0	0	0	0	0	0
3575735	1994-05-19	28	女	0	0	0	1	0	0	0	1			37舌侧发育沟	47舌侧发育沟							C1-C1-C4-C4	C1-C1-C4-C4
3575728	1987-08-09	35	女	0	0	0	1	0	0	0	1			37舌侧发育沟	47舌侧发育沟							C1-C2-C2-C2	C1-C2-C2-C5
3575677	1990-08-04	32	女	0	0	0	1	0	0	0	1			37舌侧发育沟	47舌侧发育沟							C2-C2-C2-C2	C2-C3-C3-C3
3575638	1979-12-23	43	女	0	0	0	1	0	0	0	0			37颊舌发育沟，舌侧深								C2-C2-C3-C3
3575602	1994-01-12	28	女	0	0	0	1	0	0	0	0			37颊舌发育沟，舌侧深								C2-C3-C1-C4
3575542	1993-10-08	29	女	0	0	0	1	0	0	0	1			37舌侧发育沟	47颊舌发育沟，舌侧深							C1-C2-C2-C4	C4-C2-C3-C3
3575257	1995-11-08	27	女	1	0	0	0	0	0	0	0	34ML发育沟	44ML发育沟			C4-C1-C3-C3	根中1/3	V5	C4-C3-C3-C3	根中1/3	V3
3575456	1989-08-01	33	女	1	0	0	0	1	0	0	0	34ML发育沟	44ML发育沟			C3-C3-C2-C3	根上1/3	V5	C4-C4-C1-C4	无分叉	V1
3575196	2000-07-06	22	男	0	0	0	0	0	0	0	0
3575178	1997-01-26	25	女	0	0	0	1	0	0	0	1			37颊舌发育沟，舌侧深	47颊舌发育沟，舌侧深							C2-C2-C4-C4	C4-C1-C2-C4
3575172	1989-05-16	33	男	0	0	0	1	0	0	0	1			37颊舌发育沟，舌侧深	47颊舌发育沟，舌侧深							C2-C3-C2-C4	C2-C2-C1-C4
3575111	1998-10-27	24	女	1	0	0	0	0	0	0	0	34ML发育沟	44ML发育沟			C4-C1-C3-C5	根尖1/3	V3	C4-C3-C3-C3	根尖1/3	V3
3575065	2000-05-21	22	男	0	0	0	0	0	0	0	0
3574973	1991-12-17	31	女	0	0	0	1	0	0	0	1			37舌侧发育沟	47舌侧发育沟							C1-C2-C1-C4	C2-C5-C5-C5
3574792	2002-05-15	20	女	1	0	0	1	1	0	0	1	34ML发育沟	44ML发育沟，C形根	37舌侧发育沟	47舌侧发育沟	C4-C2-C3-C3	根中1/3	V5	C4-C1-C3-C3	根中1/3	V5	C1-C2-C3-C5	C1-C2-C2-C4
3574736	1980-05-06	42	女	0	0	0	1	0	0	0	1			37舌侧发育沟	47舌侧发育沟							C1-C2-C4-C4	C1-C2-C4-C4
3574675	1999-08-16	23	女	0	0	0	0	0	0	0	0
3574532	2000-08-06	22	女	0	0	0	0	0	0	0	0	34ML发育沟				C4-C4-C4-C4	无分叉	V1
3574520	1992-06-29	30	男	0	0	0	1	0	0	0	1			颊舌发育沟，舌侧深	颊舌发育沟，舌侧深							C2-C3-C3-C4	C2-C3-C3-C3
3574431	1974-09-03	48	女	0	0	0	1	0	0	0	1			37舌侧发育沟	颊舌发育沟，舌侧深							C2-C2-C4-C4	C2-C3-C4-C4
3574477	1984-07-13	38	女	0	0	0	1	0	0	0	1			颊舌发育沟，舌侧深	舌侧发育沟							C2-C3-C3-C3	C1-C2-C2-C4
3574476	2002-05-10	20	女	0	0	0	0	0	0	0	0
3574305	1983-11-02	39	男	0	0	0	0	0	0	0	0
3574268	1979-06-11	43	男	0	0	0	0	1	0	0	0	34ML发育沟	44ML发育沟			C3-C3-C3-C3	根上1/3	V3	C4-C3-C2-C3	根中1/3	V5
3574271	1988-08-18	34	女	1	0	0	0	1	0	0	0	34ML发育沟	44ML发育沟			C4-C3-C2-C3	根中1/3	V5	C4-C3-C2-C3	根中1/3	V5
3574242	1985-12-21	37	女	0	0	0	1	0	0	0	0			37舌侧发育沟								C2-C2-C2-C2
3574202	1984-12-16	38	女	0	0	0	0	0	0	0	0
3574171	2001-05-28	21	男	1	0	0	0	1	0	0	0	34ML发育沟	44ML发育沟			C3-C2-C3-C3	根上1/3	V5	C3-C3-C2-C3	根上1/3	V5
3574017	1984-11-03	38	女	0	0	0	0	0	0	0	1				47舌侧发育沟								C3-C2-C2-C2
3574010	1996-04-10	26	女	0	0	0	1	0	0	0	0			37舌侧发育沟								C1-C2-C1-C4
3573918	1997-10-07	25	女	0	0	0	1	0	0	0	1			37颊舌发育沟，舌侧深	47舌侧发育沟							C1-C2-C2-C5	C1-C2-C2-C4
3573911	1996-08-11	26	女	0	0	0	0	0	0	0	1				47舌侧发育沟								C2-C3-C3-C2
3573821	1992-06-03	30	男	0	0	0	0	0	0	0	0
3573633	1990-02-21	32	女	0	0	0	0	0	0	0	0		44ML发育沟						C4-C3-C3-C3	根中1/3	V3
3573617	1984-07-13	38	女	0	0	0	1	0	0	0	1			37舌侧发育沟	47舌侧发育沟							C1-C1-C1-C4	C1-C2-C2-C4
3573481	1996-09-04	26	男	0	0	0	1	0	0	0	1			37舌侧发育沟	47舌侧发育沟							C2-C2-C2-C2	C2-C2-C2-C2
3573489	1997-01-29	25	男	1	0	0	0	1	0	0	0	34ML发育沟	44ML发育沟			C4-C3-C1-C4	根中1/3	V3	C4-C2-C1-C4	根中1/3	V3
3573470	1990-01-15	32	男	0	0	0	0	0	0	0	0
3567592	1999-04-08	23	男	0	0	0	0	0	0	0	0
3573254	1994-06-21	28	女	0	0	0	0	0	0	0	0
3573209	1997-06-20	25	女	0	0	0	1	0	0	0	0			37舌侧发育沟								C1-C2-C1-C4
3573219	1970-03-02	52	女	0	0	0	0	0	0	0	0
3573134	1968-07-18	54	男	1	0	0	0	0	0	0	0	34ML发育沟	44ML发育沟			C4-C4-C1-C4	无分叉	V1	C4-C1-C4-C4	无分叉	V1
3573031	1979-03-08	43	女	0	0	0	1	0	0	0	1			37舌侧发育沟	47舌侧发育沟							C1-C1-C1-C4	C1-C2-C4-C4
3572940	1996-04-04	26	女	0	0	0	1	0	0	0	1			37舌侧发育沟	47舌侧发育沟							C1-C1-C2-C2	C4-C1-C4-C4
3572927	1991-08-10	31	女	0	0	0	1	0	0	0	1			37舌侧发育沟	47舌侧发育沟							C1-C1-C1-C4	C1-C1-C2-C4
3572593	1998-10-02	24	男	0	0	0	0	0	0	0	0
3572689	1976-01-08	46	女	1	0	0	0	1	0	0	0	34颊侧发育沟	44颊侧发育沟			C4-C4-C1-C4	无分叉	V1	C4-C1-C4-C4	无分叉	V1
3572592	1977-01-02	45	男	0	0	0	0	0	0	0	0
3572605	1994-11-01	28	男	0	0	0	0	0	0	0	0
3572579	1995-07-22	27	女	0	0	0	0	0	0	0	0
3572531	1984-12-18	38	男	0	0	0	1	0	0	0	1			37舌侧发育沟	47舌侧发育沟							C1-C2-C5-C5	C2-C3-C2-C4
3572509	1984-02-03	38	女	0	0	0	0	0	0	0	1				47颊舌发育沟，舌侧深								C3-C3-C2-C2
3572439	1991-01-29	31	女	0	0	0	0	0	0	0	0
3572399	1986-09-29	36	男	0	0	0	1	0	0	0	1			37舌侧发育沟	47舌侧发育沟							C2-C3-C2-C4	C1-C2-C3-C4
3572298	1989-12-20	33	女	0	0	0	1	0	0	0	1			37颊舌发育沟，舌侧深	47舌侧发育沟							C2-C3-C2-C4	C2-C2-C1-C4
3572143	1998-02-19	24	男	0	0	0	0	1	0	0	0		颊侧发育沟						C4-C1-C3-C5	根中1/3	V5
3572210	1973-07-01	49	女	0	0	0	0	1	0	0	0	34ML发育沟	44ML发育沟			C4-C4-C4-C4	无分叉	V1	C4-C1-C5-C5	无分叉	V1
3572168	1992-05-03	30	男	0	0	0	1	0	0	0	0			37颊舌发育沟，舌侧深								C2-C3-C3-C2
3572173	1995-03-01	27	女	1	0	0	0	0	0	0	0	34L发育沟	44L发育沟			C4-C2-C3-C3	根中1/3	V5	C4-C4-C4-C4	无分叉	V1
3572163	1989-05-18	33	女	0	0	0	0	0	0	0	0
3572097	2000-12-11	22	女	0	0	0	0	0	0	0	0	34ML发育沟				C4-C3-C3-C5	根尖1/3	V5
3571992	1993-10-09	29	女	0	0	0	0	1	0	0	0		44ML发育沟						C3-C2-C3-C3	根上1/3	V3
3572054	2001-10-10	21	女	0	0	0	0	0	0	0	0
3572023	1996-08-31	26	男	0	0	0	0	0	0	0	0
3571976	2000-04-24	22	女	0	0	0	1	0	0	0	1			37颊舌发育沟，舌侧深	47舌侧发育沟							C2-C3-C2-C2	C2-C2-C2-C3
3571958	1998-02-27	24	女	0	0	0	1	0	0	0	1			37舌侧发育沟	47舌侧发育沟							C1-C1-C1-C4	C1-C1-C1-C4
3571893	1986-06-05	36	女	0	0	0	1	0	0	0	1			37舌侧发育沟	47舌侧发育沟							C1-C1-C4-C4	C1-C2-C2-C4
3571831	1997-04-24	25	女	1	0	0	0	0	0	0	0	34ML发育沟	44ML发育沟			C4-C3-C2-C3	根中1/3	V5	C4-C3-C2-C3	根尖1/3	V5
3571789	1997-10-10	25	女	0	0	0	1	0	0	0	1			37舌侧发育沟	47颊舌发育沟，舌侧深							C2-C2-C2-C4	C2-C2-C2-C4
3571775	1989-04-19	33	男	0	0	0	1	0	0	0	0			37舌侧发育沟								C1-C2-C2-C2
3571576	1992-09-24	30	女	0	0	0	1	0	0	0	1			37舌侧发育沟	47舌侧发育沟							C1-C2-C2-C4	C1-C2-C1-C4
3571539	2002-08-26	20	女	0	0	0	1	0	0	0	0			37颊舌发育沟，舌侧深								C2-C2-C2-C4
3571343	1991-12-24	31	女	0	0	0	0	0	0	0	0
3571380	1989-10-21	33	男	0	0	0	0	0	0	0	0	34ML发育沟	44ML发育沟			C4-C4-C4-C4	无分叉	V1	C4-C3-C2-C3	根中1/3	V5
3555392	1954-07-01	68	女	0	0	0	0	0	0	0	1	34ML发育沟	44ML发育沟		47舌侧发育沟	C3-C3-C3-C3	根上1/3	V5	C3-C3-C3-C3	根上1/3	V5		C2-C3-C3-C3
3584260	2005-10-05	17	男	0	0	0	1	0	0	0	1			37颊舌发育沟，舌侧深	47舌侧发育沟							C1-C2-C2-C2	C1-C2-C2-C4
3584281	1997-09-16	25	女	0	0	0	0	0	0	0	0
3584155	1992-12-20	30	女	0	0	0	1	0	0	0	1			颊舌发育沟，舌侧深	颊舌发育沟，舌侧深							C3-C3-C2-C2	C2-C3-C2-C4
3583907	2001-09-13	21	女	0	0	0	1	0	0	0	1			37舌侧发育沟	47颊舌发育沟，舌侧深							C1-C4-C4-C4	C2-C2-C1-C4
3583968	1996-01-24	26	女	0	0	0	1	0	0	0	1			37舌侧发育沟	47舌侧发育沟							C1-C1-C1-C1	C1-C1-C1-C1
3612675	2005-09-29	17	女	0	0	0	0	1	0	0	1	34ML发育沟	44L发育沟		47舌侧发育沟	C4-C4-C4-C5	根尖1/3	V5	C4-C4-C2-C5	根尖1/3	V5		C2-C2-C2-C2
3612578	1991-11-29	31	女	0	0	0	1	0	0	0	1			舌侧发育沟	舌侧发育沟							C2-C2-C2-C4	C2-C2-C4-C4
3612425	1997-10-27	25	女	0	0	0	1	0	0	0	1			舌侧发育沟	舌侧发育沟							C1-C1-C1-C1	C1-C1-C1-C1
3612465	1997-02-24	25	女	0	0	0	1	0	0	0	1			舌侧发育沟	舌侧发育沟							C1-C2-C2-C4	C1-C2-C2-C4
3612368	2002-04-04	20	男	0	0	0	1	0	0	0	1			颊舌发育沟，舌侧深	舌侧发育沟							C2-C3-C3-C3	C3-C3-C3-C3
3612311	2001-11-15	21	男	1	0	0	0	1	0	0	0	L发育沟	ML发育沟			C4-C4-C2-C5	根尖1/3	V5	C4-C3-C2-C3	根中1/3	V5
3612143	2004-07-19	18	男	0	0	0	0	0	0	0	0	ML发育沟	ML发育沟			C4-C3-C3-C3	根尖1/3	V5	C4-C4-C4-C4	无分叉	V1
3612194	1987-10-28	35	女	0	0	0	0	0	0	0	0	ML发育沟	ML发育沟			C4-C3-C3-C3	根中1/3	V5	C4-C3-C3-C3	根中1/3	V5
3612119	1995-09-17	27	女	0	0	0	1	0	0	0	1			舌侧发育沟	舌侧发育沟							C4-C1-C2-C4	C4-C1-C1-C4
3612068	1986-02-10	36	女	0	0	0	1	0	0	0	1			舌侧发育沟	舌侧发育沟							C2-C2-C4-C4	C3-C3-C3-C2
3611946	2000-09-26	22	女	1	0	0	1	0	0	0	1	ML发育沟	ML发育沟	舌侧发育沟	舌侧发育沟	C4-C2-C3-C4	根中1/3	V3	C4-C3-C2-C4	根中1/3	V3	C1-C1-C2-C4	C1-C2-C1-C4
3610086	1997-11-13	25	男	1	0	0	1	0	0	0	0	ML发育沟	ML发育沟	颊舌发育沟，舌侧深		C4-C1-C3-C3	根中1/3	V5	C4-C3-C3-C3	根中1/3	V5	C1-C1-C2-C4
3608671	1982-06-24	40	男	0	0	0	0	0	0	0	0

## Sheet: 6C
陈琪	3459182	18	38262	女	0	0	1	0	0	0	0	1					36舌侧发育沟,		C1-C2-C2-C4
季怡然	3542253	18	38285	女	0	0	0	1	0	0	1	0						46C形根，舌侧深		C2-C3-C2-C3
张逸伟	3458507	21	37201	男	0	0	1	缺失	0	0	0	0					36颊舌发育沟，舌侧深		C1-C2-C3-C3
倪梓轩	3515665	22	36791	男	1	0	0	1	1	0	1	0						46颊舌侧发育沟，舌侧深		C2-C3-C3-C3
徐睿涵	3504488	22	36541	女	0	0	1	1	0	0	1	1					36颊舌发育沟，舌侧深	46舌侧发育沟	C3-C3-C3-C3	C1-C3-C2-C3
薛雅元	3431866	23	36394	女	1	0	0	1	0	0	1	0						46舌侧发育沟		C4-C1-C1-C4
崔赛君	3526252	28	34579	女	0	0	0	1	0	0	1	1						46舌侧发育沟		C4-C3-C3-C3
李琰	3554139	30	33902	女	0	0	1	0	0	0	1	0					36舌侧发育沟	46舌侧发育沟	C1-C2-C2-C3	C2-C3-C3-C3
黄建秀	3488461	62	21931	女	0	0	0	0	0	0	1	1						46颊舌发育沟，舌侧深		C2-C2-C2-C2

## Sheet: 5C
刘紫豪	2106230003	19	37795	男	19	0	0	0	0	0	0	0	0	35舌侧发育沟		C4-C4-C4-C4	V1	无分叉	C4	C4	C4	C4
何睦	3449374	20	37543	男	19	1	1	0	0	1	0	0	0	35舌侧发育沟		C4-C1-C2-C3	V3	根中1/3	C4	C1	C2	C3
宋梓硕	3437346	23	36231	男	23	1	0	0	0	0	1	0	0		45L发育沟	C4-C1-C4-C4	V1	无分叉	C4	C1	C4	C4
侍雪凯	2107060025	41	29773	男	41	0	0	0	0	1	1	0	0		45ML发育沟	C4-C3-C2-C4	V3	根上1/3	C4	C3	C2	C4
王可欣	3549159	21	37160	女	20	0	0	0	0	0	0	0	0	35舌侧发育沟，		C4-C4-C4-C4	V1	无分叉	C4	C4	C4	C4
刘超然	3550794	24	36038	女	23	0	0	0	1	0	0	0	1	35ML发育沟		C4-C4-C4-C4	V1	无分叉	C4	C4	C4	C4
王雪娟	3518751	28	34613	女	27	0	1	0	1	0	0	0	1	35远中发育沟		C4-C1-C4-C4	V1	无分叉	C4	C1	C4	C4
吴新娴	3518303	32	33219	女	31	1	1	0	1	0	0	0	1	35舌侧发育沟		C4-C2-C3-C5	V5	根中1/3	C4	C2	C3	C5
秦修华	3555392	68	19906	女	68	0	0	0	0	0	0	0	1	35ML发育沟		缺失	根管钙化无法
